# Supplementary material
Source: HighWire-hosted journal article supplement (https://gut.bmj.com/content/70/10/2012)
Supplement: inline-supplementary-material-1 [file inline-supplementary-material-1.pdf]

## Methods

### *Study design and population*

This study was approved by the Institutional Review Board of the University of Hong Kong/Hospital Authority Hong Kong West Cluster. This was a retrospective, territory-wide cohort study of patients with confirmed COVID-19 between 1<sup>st</sup> January 2020 and 22<sup>nd</sup> August 2020 in Hong Kong. The patients were identified from the Clinical Data Analysis and Reporting System (CDARS), a territory-wide database that centralizes patient information from individual local hospitals to establish comprehensive medical data, including clinical characteristics, disease diagnosis, laboratory results, and drug treatment details. Patients demographics, prior comorbidities, hospitalization characteristics before admission due to COVID-19, medication prescriptions, laboratory examinations of complete blood counts, biochemical tests, diabetes mellitus tests, cardiac function tests, c-reactive protein, and blood gas tests were extracted. The list of ICD-9 codes for medication items for each drug class, comorbidity identification, codes of intubation procedure are show below in **Supplementary Tables 1, 2 and 3**, respectively.

### *Outcomes and statistical analysis*

The primary outcome was a composite of need for intensive care admission, intubation or all-cause mortality. Mortality data were obtained from the Hong Kong Death Registry, a population-based official government registry with the registered death records of all Hong Kong citizens linked to CDARS. The need for ICU admission and intubation were extracted directly from CDARS.

Descriptive statistics are used to summarize baseline clinical characteristics of all patients with COVID-19 and based on the occurrence of the primary outcome. Continuous variables were presented as median (95% confidence interval [CI] or interquartile range [IQR]) and categorical variables were presented as count (%). The Mann-Whitney U test was used to compare continuous variables. The  $\chi^2$  test with Yates' correction was used for 2×2 contingency data. Propensity score matching approach was conducted to generate control groups for comparison with famotidine cohort and PPIs cohort, respectively, both with 1:5 ratio based on demographics, past comorbidities, and medications except for famotidine and PPIs. Univariate Cox regression was used to identify significant risk predictors for the primary outcome. Hazard ratios (HRs) with corresponding 95% CIs and p values were reported. All significance tests were two-tailed and considered significant if the P-value was less than 0.05. Statistical analyses were performed using RStudio software (Version: 1.1.456) and Python (Version: 3.6).

**Supplementary Figures**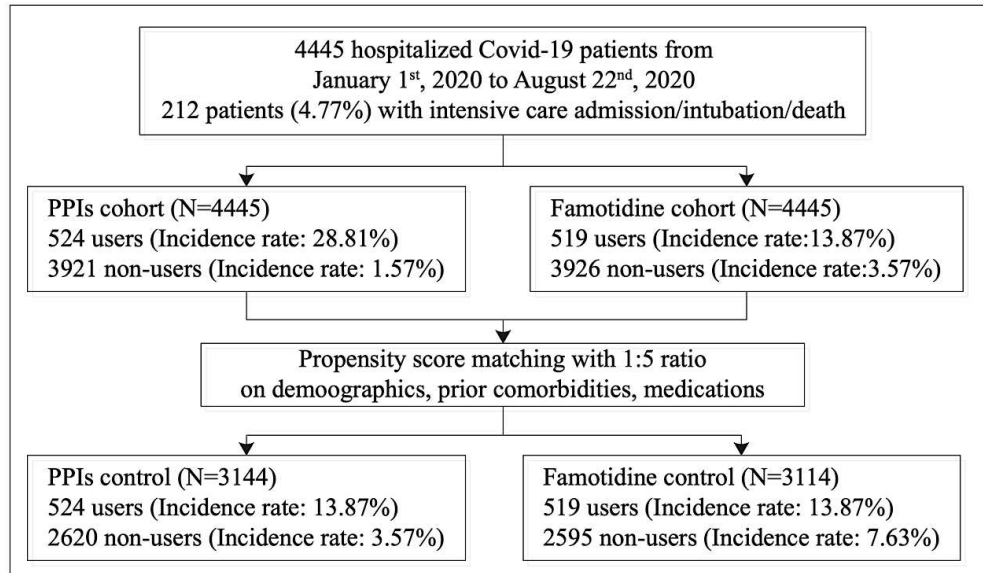**Supplementary Figure 1. Flow diagram for patient identification with outcomes.**

## Supplementary Tables

### Supplementary Table 1. Drugs prescribed for COVID-19 patients

---

#### **ACEI**

LISINAPRIL, PERINDOPRIL TERTBUTYLAMINE, PERINDOPRIL, RAMIPRIL, ENALAPRIL MALEATE, CAPTOPRIL, CAPTOPRIL TABLET, CAPTOPRIL, CAPTOPRIL TABLET 12.5MG--->, CAPTOPRIL, PERINDOPRIL ARGININE, PERINDOPRIL, CAPTOPRIL \*FOR ORAL SOLUTION\*, CAPTOPRIL, PERINDOPRIL, MALEATE, ARGININE

#### **ARB**

LOSARTAN POTASSIUM, IRBESARTAN, TELMISARTAN, CANDESARTAN CILEXETIL, CANDESARTAN, IRBESARTAN 300MG + HYDROCHLOROTHIAZ, IRBESARTAN, MICARDIS PLUS 40/12.5 (OR EQUIV), MICARDIS, MICARDIS PLUS 40/12.5 (OR EQUIV), MICARDIS, CO-DIOVAN 80/12.5 (OR EQUIV), DIOVAN, VALSARTAN, IRBESARTAN 150MG + HYDROCHLOROTHIAZ, IRBESARTAN, LOSARTAN K 50MG + HYDROCHLOROTHIAZI, LOSARTAN, LOSARTAN K 100MG + HYDROCHLOROTHIAZ, CO-DIOVAN 160/12.5 (OR EQUIV), SPARSENTAN/IRBESARTAN (CLINICAL TRI, IRBESARTAN, LOSARTAN OWN STOCK, LOSARTAN, CILEXETIL

#### **Steroid**

PREDNISOLONE, PROMETHAZINE COMPOUND, PROMETHAZINE HCL, PREDNISOLONE (SODIUM PHOSPHATE), METHYLPREDNISOLONE SODIUM SUCCINATE

#### **Kaletra**

KALETRA 100/25 (OR EQUIV), KALETRA (OR EQUIV)

#### **RIBAVIRIN**

#### **INTERFERON BETA-1B**

#### **HYDROXYCHLOROQUINE**

HYDROXYCHLOROQUINE SULPHATE

#### **Calcium channel blockers**

AMLODIPINE (BESYLATE), OLMESARTAN/NORVASC 40MG/5MG, DILTIAZEM HCL, NIFEDIPINE, VERAPAMIL HCL, FELODIPINE

#### **Beta blockers**

ATENOLOL, BISOPROLOL FUMARATE, METOPROLOL TARTRATE, METOPROLOL, CARVEDILOL, PROPRANOLOL HCL

#### **Diuretics for heart failure**

SPIRONOLACTONE, FRUSEMIDE (FUROSEMIDE), METOLAZONE

#### **Diuretics for hypertension**

AMILORIDE HCL, HYDROCHLOROTHIAZIDE, INDAPAMIDE (NATRILIX SR) SUSTAINED, INDAPAMIDE, DYAZIDE (OR EQUIV)

#### **Nitrates**

ISOSORBIDE DINITRATE, ISOSORBIDE, DINITRATE

---

---

**Other Antihypertensive drugs**

METHYLDOPA, DOXAZOSIN (MESYLATE) GITS, TERAZOSIN HCL

**Proton pump inhibitors**

Omeprazole, Lansoprazole, Dexlansoprazole, Esomeprazole, Pantoprazole, Rabeprazole, Ilaprazole

---

**Supplementary Table 2. Codes for Comorbidities of COVID-19 Patients**

| <b>Comorbidity</b> | <b>Codes</b>                                                                                                                                                                                                                                                                                                                                                                                                                                                                                                                                                                                                                                                                                                                                                                                                                                                                                                                                                                                                       |
|--------------------|--------------------------------------------------------------------------------------------------------------------------------------------------------------------------------------------------------------------------------------------------------------------------------------------------------------------------------------------------------------------------------------------------------------------------------------------------------------------------------------------------------------------------------------------------------------------------------------------------------------------------------------------------------------------------------------------------------------------------------------------------------------------------------------------------------------------------------------------------------------------------------------------------------------------------------------------------------------------------------------------------------------------|
| Respiratory        | 786.09, 518.81, 780.53, 137, E912, 465.9, 518.81, 518.81, 79.6, 518.81, 519.8, 780.59, 799.1, 780.57, 518.82, 480.1, 786.3, 519.8, 997.3, 165.9, 519.9, 648.91, 162.9, 162.3, 197, 162.5, 162.4, 486, 518.89, 496, 162.8, 415.1, V10.11, 518, 162.9, 11.96, 482.1, 507, 513, 11.9, 511.8, 511.1, 11.94, 516.8, 793.1, 482.4, 507, 515, 197, 11.93, 482, 482.83, 518.4, 482.3, 482.2, 415.1, 502, 518.89, 235.7, 793.1, 934.8, 516.9, 136.3, 38.49, 506, 112.4, 487, 481, 117.9, 38.2, 518, 11.95, 79.89, 518.1, 480.9, 505, 516.8, 495.9, 518.3, 11.23, 416.8, 513, 397.1, 117.3, 483, 508, 998.81, 416, 514, 861.21, 502, 934.8, 480.8, 648.93, 11.2, 492.8, 484.6, 78.5, 484.1, 516.3, 415.1, 416.9, 415, 416.9, 429.89, 415, 747.49, 745, 417, 770.7, 427.5, 416.9, 416, 416.8, 746.02, 573.8, 642.9, 416, 747.3, 747.3, 770.3, 779.8, 515, 424.3, 416, 417.8, 747.3, 747.3, 745.4, 518.81, 786.09, V12.6, 478, 748.5, 162.9, 996.84, 748.5, 748.6, V42.1, 748.5, 11.05, 162, 518, 747.42, 518.89, 748.5, 517.2 |
| Renal              | 198.7, 189, 189, 585.9, V56.0, 189.1, 584.9, 189.1, 593.9, 189, 189, 189.8, 239.5, 189, 583.81, 593.9, 591, V10.52, 250.4, 591, 255.4, 590.8, 586, 585.1, 591, 189, 591, 239.7, 788, 996.39, 189.1, 588.9, 592, 996.39, 250.4, 593.2, 255.4, 572.4, 194, 255, 453.3, 198, 585.9, 996.39, 996.39, 590.1, 591, 591, 223, 591, 584.9, 585.9, 250.41, 996.39, 581.9, 227, 593.5, 583.89, 593.89, 404.93, 255.5, 788.9, 250.43, 227, 405.92, 592, 753.12, 996.39, E879.1, V42.0, 592, 580.89, 403.9, 593.9, V59.4, 585.9, 580.9, 250.41, 996.39, 585.9, 794.4, 584.8, 584.5, 255.9, 441.4, V58.49, 404.11, 593.9, 592, 585, 759.1, 753.11, E879.1, 753.15, 585.9, 274, 588.8, 403.91, 404.9, 404.91, 404.92, 403, 404.01, 779.8, 250.4, 227, 227, 227, 404.93, 996.81, 593.89, 753.8, 593.2, 592, 753, 996.81, 223, 589.1, 996.81, 582.9, 585.9, 996.81, 753.1, 753.3, E878.0, 593.9, 753.3, 753.17, 583.9, 593.9, 589, 866                                                                                             |
| Endocrine          | 202.8, 200.1, 200.12, 201.9, 204, 202.88, 200.18, 196, 204.01, 785.6, 200.11, 200.13, 202.8, 785.6, 202.85, 202.81, 202.8, 202.8, 196, 196.9, 202.8, 202.82, 785.6, 202.8, 202, 202.87, V10.79, 785.6, 202.84, 202.01, 196.8, 457.1, 12.1, 785.6, V10.79, 196.5, 196.2, 238.7, 196.1, 200.14, 457.2, 238.7, V10.61, 201.9, 457, 202.8, 289.3, 245.2, 238.7, 785.6, 457.9, 785.6, 202.93, 196.9, 202.97, 757, V10.71, 288.8, 204.1, 202.83, 457.1, 289.3, 785.6, V77.9, 237.4, 239.7, 198.89, 623.5, 259.9, 200.2, V10.71                                                                                                                                                                                                                                                                                                                                                                                                                                                                                           |

---

|                   |                                                                                                                                                                                                                                                                                                                                                                                                                                                                                                                                                                                                                                                                                                                                                                                                                                                                                                                                                                                                                                                                                                                                                                                                                                                                                                                                       |
|-------------------|---------------------------------------------------------------------------------------------------------------------------------------------------------------------------------------------------------------------------------------------------------------------------------------------------------------------------------------------------------------------------------------------------------------------------------------------------------------------------------------------------------------------------------------------------------------------------------------------------------------------------------------------------------------------------------------------------------------------------------------------------------------------------------------------------------------------------------------------------------------------------------------------------------------------------------------------------------------------------------------------------------------------------------------------------------------------------------------------------------------------------------------------------------------------------------------------------------------------------------------------------------------------------------------------------------------------------------------|
| Diabetes mellitus | 251.2, 362.01, 362.02, 250.4, 250.82, 790.2, 790.6, 250.5, 250.5, 250.6, 357.2, 790.2, 250, 250.4, 250.6, 250.8, 250.51, 250.5, 250.8, 250.82, 250.51, 250.51, V77.1, 250.12, 251.2, 250.12, 250.5, 250.83, 251.2, 250.41, 251.1, 250.52, 250.5, 648.81, 250.43, 250.53, 250.53, 250.81, 250.22, 250.13, 250.22, 250.83, 250.41, 250.5, 250.52, 250.52, 250.82, 253.5, V18.0, 588.1                                                                                                                                                                                                                                                                                                                                                                                                                                                                                                                                                                                                                                                                                                                                                                                                                                                                                                                                                   |
| Hypertension      | 401.9, 401.9, 250.82, 790.6, 401.9, 401.9, 250.82, 796.2, 402.9, 250.83, 405.99, 642.93, 642.01, 642.91, 401.9, E942.6, 405.09, 403.9, 437.2, 401, 401.1, 401, 642.33, 348.2, 779.8, 365.04, 572.3, 416, 416, 405.91, 416.8, 642.3                                                                                                                                                                                                                                                                                                                                                                                                                                                                                                                                                                                                                                                                                                                                                                                                                                                                                                                                                                                                                                                                                                    |
| Gastrointestinal  | 153.3, 154.1, 153.9, 569.89, 154, 153.1, 578.9, 560.9, 569.3, 537.89, 558.9, 562.1, 153.6, 239, 532.3, 569.89, 532.7, 535.6, 558.9, 38.42, 569.89, 8.45, 153.2, 569.49, 79.89, 532.9, V58.11, 569, 154.1, 41.4, 537.89, 152.1, 578.9, V10.05, 787.8, 197.4, 535.5, V10.06, 9, 569.83, 569.6, 153.4, 560.9, 537.3, 41.04, 569.84, 239, 569.81, 8.8, 535, 560.9, 532, V45.89, V12.72, 532.4, V10.09, 560.81, 235.2, 38.49, 8.45, 235.2, 532.9, 569.81, 537.89, 557.9, 569.41, 997.4, 14.8, 787.99, 8.46, 535.5, 569.41, 997.4, 578.9, 569.82, 537.9, 560.1, 569.82, 557.9, 211.3, 556.9, 562, 558.9, 578.9, 536.9, 8.46, 535.6, 566, V71.9, 569.49, 564.3, V44.4, 569.89, 564.8, 8.46, 569.83, 997.4, 997.4, 997.4, 562.11, 211.2, 9.1, 211.3, 8.47, 8.5, 211.3, 569.83, 532.1, 535.61, 560, 569.83, 565.1, 619.1, 152.9, 568, 566, 569.43, 152, 8.46, 562.11, 8.61, 569.83, 569.83, 569.81, 596.1, 535.5, 151.4, 151.9, 151.5, 151.8, 151.1, 456.8, 531.7, 535.4, 531.3, V15.2, 537.89, 211.1, 531.9, V10.04, 235.2, 531, 531.4, 456.8, 535.1, 151.3, 230.2, 151.6, 535, 211.1, 536.3, 535, V10.04, 535.51, 578.9, 531.1, 535.1, 456.8, 531.5, 537.84, 535.01, 530.7, 535.1, 535.2, 535.5, 537.6, 202.83, 535.1, 531.4, 558.9, 558.9, 558, 569.85, 153, 555.1, 562.1, 562.13, 562.11, 562.12, 569.83, V76.49, 560.2, 230.4, 569.3, 154 |
| Stroke            | 434.11, 434.91, 433.01, 433.11, 433.21, 433.31, 433.81, 433.91, 434.01, 434.91, 436, 435, 430, 431, 432, 432.1, 432.9, 853, 852, 852.01, 852.02, 852.03, 852.04, 852.05, 852.06, 852.07, 852.08, 852.09, 852.2, 852.21, 852.22, 852.23, 852.24, 852.25, 852.26, 852.27, 852.28, 852.29, 852.4, 852.41, 852.42, 852.43, 852.44, 852.45, 852.46, 852.47, 852.48, 852.49, I64, 992, 992, 434.01, 433, 331, 851, 434, 434.1, 348.5, 747.81, 414.9, 457.9, 720, 681.1, 473.9, 290.3, 524.02, 720, 414.9, 215.3                                                                                                                                                                                                                                                                                                                                                                                                                                                                                                                                                                                                                                                                                                                                                                                                                             |

---

**Supplementary Table 3. Codes for Identifying Patients Needing Intubation**

---

| <b>Procedure</b> | <b>Codes and Description</b>                |
|------------------|---------------------------------------------|
| Intubation       | Cont invasive mech vent->96 hours (96.72:0) |
|                  | Cont invasive mech vent-<96 hours (96.71:0) |
|                  | Invasive mechanical ventilation (96.70:0)   |
|                  | Endotracheal intubation (96.04:0)           |
|                  | Respiratory tract intubation (96.05:0)      |

---



**Supplementary Table 4. Baseline clinical characteristics of patients with or without proton pump inhibitor (PPI)/famotidine use.**\* for  $p \leq 0.05$ , \*\* for  $p \leq 0.01$ , \*\*\* for  $p \leq 0.001$ 

| Characteristics                  | PPIs/Famotidine use (N=908)    | No PPIs/famotidine use (N=3537) | P value    |
|----------------------------------|--------------------------------|---------------------------------|------------|
|                                  | Median (IQR);Max;N or Count(%) | Median (IQR);Max;N or Count(%)  |            |
| Composite outcome                | 173(19.05%)                    | 39(1.10%)                       | <0.0001*** |
| Duration to outcome, days        | 25(15-40);206; n=908           | 28(18-130);234; n=3537          | <0.0001*** |
| <b>Demographics</b>              |                                |                                 |            |
| Male gender                      | 476(52.42%)                    | 1753(49.56%)                    | 0.3957     |
| Age, years                       | 62.2(51.5-71.8);98.7; n=908    | 39.5(26.1-56);100.6; n=3537     | <0.0001*** |
| <b>Past comorbidities</b>        |                                |                                 |            |
| Cardiovascular                   | 191(21.03%)                    | 132(3.73%)                      | <0.0001*** |
| Respiratory                      | 896(98.67%)                    | 3423(96.77%)                    | 0.7325     |
| Renal                            | 127(13.98%)                    | 112(3.16%)                      | <0.0001*** |
| Endocrine                        | 13(1.43%)                      | 26(0.73%)                       | 0.0739     |
| Diabetes mellitus                | 213(23.45%)                    | 294(8.31%)                      | <0.0001*** |
| Hypertension                     | 321(35.35%)                    | 383(10.82%)                     | <0.0001*** |
| Gastrointestinal                 | 890(98.01%)                    | 3401(96.15%)                    | 0.7369     |
| Stroke                           | 139(15.30%)                    | 52(1.47%)                       | <0.0001*** |
| <b>Hospitalization</b>           |                                |                                 |            |
| Number of hospitalizations       | 1(1-2);98; n=908               | 1(1-2);17; n=3376               | 0.7621     |
| Length of hospital stay, days    | 17(12-26);326; n=908           | 12(8-17);351; n=3376            | <0.0001*** |
| Number of emergency readmissions | 2(1-3);32; n=110               | 1(1-2);13; n=79                 | 0.0007***  |

**Medications**

|                             |                             |              |            |
|-----------------------------|-----------------------------|--------------|------------|
| PPIs                        | 524(57.70%)                 | -            | -          |
| PPIs dosage, mg             | 1080(600-2430);20880; n=524 | -            | -          |
| Famotidine                  | 519(57.15%)                 | -            | -          |
| Famotidine dosage, mg       | 1040(480-2440);43520; n=519 | -            | -          |
| ACEI                        | 131(14.42%)                 | 120(3.39%)   | <0.0001*** |
| ARB                         | 115(12.66%)                 | 127(3.59%)   | <0.0001*** |
| Steroid                     | 195(21.47%)                 | 437(12.35%)  | <0.0001*** |
| Kaletra                     | 75(8.25%)                   | 27(0.76%)    | <0.0001*** |
| Ribavirin                   | 338(37.22%)                 | 789(22.30%)  | <0.0001*** |
| Interferon beta-1B          | 663(73.01%)                 | 1202(33.98%) | <0.0001*** |
| hydroxychloroquine          | 28(3.08%)                   | 64(1.80%)    | 0.0266*    |
| Calcium channel blockers    | 325(35.79%)                 | 430(12.15%)  | <0.0001*** |
| Beta blockers               | 184(20.26%)                 | 144(4.07%)   | <0.0001*** |
| Diuretics for heart failure | 132(14.53%)                 | 61(1.72%)    | <0.0001*** |
| Diuretics for hypertension  | 7(0.77%)                    | 8(0.22%)     | 0.0284*    |
| Nitrates                    | 28(3.08%)                   | 9(0.25%)     | <0.0001*** |
| Other antihypertensives     | 87(9.58%)                   | 63(1.78%)    | <0.0001*** |

**Complete blood count tests**

|                                 |                              |                               |            |
|---------------------------------|------------------------------|-------------------------------|------------|
| MCV, fL                         | 87.7(84.2-91.2);110.6; n=670 | 86.5(82.6-89.7);104.5; n=2269 | 0.2531     |
| Basophil, x10 <sup>9</sup> /L   | 0.01(0-0.02);0.19; n=820     | 0.01(0-0.02);0.2; n=2864      | 0.9721     |
| Eosinophil, x10 <sup>9</sup> /L | 0.004(0-0.06);1.25; n=848    | 0.042(0-0.1);2.25; n=2991     | <0.0001*** |
| Lymphocyte, x10 <sup>9</sup> /L | 1.1(0.752-1.5);4.66; n=849   | 1.49(1.09-1.93);16.99; n=2999 | <0.0001*** |

|                                 |                               |                                 |            |
|---------------------------------|-------------------------------|---------------------------------|------------|
| Monocyte, x10 <sup>9</sup> /L   | 0.5(0.358-0.658);3.26; n=849  | 0.5(0.38-0.62);2.32; n=2999     | 0.8753     |
| Neutrophil, x10 <sup>9</sup> /L | 3.5(2.6-4.69);27.17; n=849    | 3.2(2.37-4.256);15.82; n=2999   | 0.1231     |
| WBC, x10 <sup>9</sup> /L        | 5.39(4.23-6.63);29.64; n=859  | 5.43(4.36-6.79);23.9; n=3059    | 0.3589     |
| MCH, g/dL                       | 29.9(28.5-31.1);36.8; n=859   | 29.6(28.2-30.7);35.1; n=3059    | 0.7827     |
| Platelet, x10 <sup>9</sup> /L   | 197(158-241.75);778; n=858    | 224(183-279);722; n=3059        | <0.0001*** |
| RBC, x10 <sup>12</sup> /L       | 4.51(4.14-4.8785);6.97; n=859 | 4.74(4.38-5.12);7.45; n=3060    | 0.1123     |
| HCT, L/L                        | 0.39(0.36-0.42);0.52; n=749   | 0.41(0.38-0.43);0.53; n=2636    | 0.2315     |
| <b>Biochemical tests</b>        |                               |                                 |            |
| Potassium, mmol/L               | 3.8(3.5-4.1);5.9; n=744       | 3.8(3.6-4.1);5.74; n=2251       | 0.8762     |
| Urate, mmol/L                   | 0.3245(0.26-0.45);0.621; n=50 | 0.285(0.235-0.3633);0.635; n=77 | 0.0515     |
| Albumin, g/L                    | 38(33.1-42);144.5; n=746      | 41(38-44.4);146; n=2255         | 0.0823     |
| Sodium, mmol/L                  | 138(135-140.6);147.49; n=745  | 139(137-140.8);149.42; n=2257   | 0.6261     |
| Urea, mmol/L                    | 4.53(3.4-6.1);39.6; n=745     | 3.77(3.02-4.7);41.95; n=2255    | <0.0001*** |
| Protein, g/L                    | 72.3(68.2-76.7);93.2; n=634   | 74.1(70.9-77.9);92.7; n=2049    | 0.2561     |
| Creatinine, umol/L              | 74.3(61.4-91);1280; n=745     | 68.6(58-82);361; n=2257         | <0.0001*** |
| Alkaline phosphatase, U/L       | 66(55-83);932; n=740          | 64.25(53-80);550; n=2248        | 0.0877     |
| Aspartate transaminase, U/L     | 30(22.1-49);1807.4; n=312     | 25(20.7-38);863; n=680          | <0.0001*** |
| Alanine aminotransferase, U/L   | 25(17-39);380; n=610          | 22.25(16-34);583; n=1816        | 0.0001**   |
| Bilirubin, umol/L               | 8(6-12);235; n=739            | 7.6(5.4-10.4);104.2; n=2248     | <0.0001*** |
| Glucose, mmol/L                 | 6.1(5.3-7.6);29.3; n=758      | 5.5(4.98-6.5);26.8; n=2187      | <0.0001*** |
| <b>Diabetes mellitus tests</b>  |                               |                                 |            |
| HbA1c, g/dL                     | 13.1(11.5-14.2);17.5; n=859   | 13.5(12.2-14.7);18.1; n=3060    | <0.0001*** |

|                                       |                                  |                                  |            |
|---------------------------------------|----------------------------------|----------------------------------|------------|
| Cholesterol, mmol/L                   | 3.7(2.5-4.6);7.6; n=297          | 4(2.9-5);9.7; n=366              | 0.005**    |
| D-dimer, ng/mL                        | 371.3(199.04-826.2);11200; n=226 | 270(154.5-476.8);6579.9; n=579   | <0.0001*** |
| High sensitive troponin-I, ng/L       | 5.5(2.13-11.96);3876.3; n=363    | 2.7405(0.86-5.31);115.3; n=868   | <0.0001*** |
| Lactate dehydrogenase, U/L            | 230(185-300);1116; n=730         | 189.95(161.2-227.1);1374; n=2426 | <0.0001*** |
| APTT, second                          | 31.3(27.6-34.7);120; n=596       | 30.8(27.7-34.4);55.2; n=1457     | 0.4293     |
| Prothrombin Time/INR, second          | 12(11.4-12.7);43.4; n=424        | 12(11.5-12.6);31.7; n=1031       | 0.6661     |
| C-reactive protein, mg/dL             | 1.18(0.31-4.08);34; n=858        | 0.31(0.1-0.89);29.82; n=2996     | <0.0001*** |
| <b>Blood gas tests</b>                |                                  |                                  |            |
| HCO <sub>3</sub> /Bicarbonate, mmol/L | 23.1(20.25-25.2);32.8; n=115     | 22.8(19.85-25);29.5; n=52        | 0.6745     |
| Base excess, mmol/L                   | -0.7(-3-1.4);9.5; n=304          | -0.2(-2.25-1.9);7.2; n=208       | 0.0272*    |
| Blood pCO <sub>2</sub> , kPa          | 4.825(4.09-5.59);10.94; n=304    | 5.01(4.24-5.85);8.32; n=209      | 0.1842     |
| Blood pH                              | 7.42(7.37-7.47);7.612; n=304     | 7.42(7.38-7.47);7.541; n=209     | 0.8438     |
| Calcium, mmol/L                       | 1.135(1.06-1.175);1.33; n=28     | 1.125(1.115-1.19);1.31; n=8      | 0.4235     |

**Supplementary Table 5. Baseline clinical characteristics of patients with or without proton pump inhibitor (PPI) use before and after propensity score matching (1:5)**\* for  $p \leq 0.05$ , \*\* for  $p \leq 0.01$ , \*\*\* for  $p \leq 0.001$ 

| Characteristics           | After 1:5 matching                                |                                                       | P value    | Before matching                                   |                                                       | P value    |
|---------------------------|---------------------------------------------------|-------------------------------------------------------|------------|---------------------------------------------------|-------------------------------------------------------|------------|
|                           | PPIs (N=524)<br>Median (IQR);Max;N<br>or Count(%) | No PPIs (N=2620)<br>Median (IQR);Max;N<br>or Count(%) |            | PPIs (N=524)<br>Median (IQR);Max;N<br>or Count(%) | No PPIs (N=3921)<br>Median (IQR);Max;N<br>or Count(%) |            |
| <b>Demographics</b>       |                                                   |                                                       |            |                                                   |                                                       |            |
| Male gender               | 307(58.58%)                                       | 1494(57.02%)                                          | 0.7612     | 307(58.58%)                                       | 1922(49.01%)                                          | 0.0228*    |
| Age, years                | 65.2(57.1-73.9);98.7;<br>n=524                    | 62.6(54.4-70.3);100.6;<br>n=2620                      | <0.0001*** | 65.2(57.1-73.9);98.7;<br>n=524                    | 41(27.1-57.6);100.6;<br>n=3921                        | <0.0001*** |
| <b>Past comorbidities</b> |                                                   |                                                       |            |                                                   |                                                       |            |
| Cardiovascular            | 136(25.95%)                                       | 430(16.41%)                                           | <0.0001*** | 136(25.95%)                                       | 187(4.76%)                                            | <0.0001*** |
| Respiratory               | 516(98.47%)                                       | 2581(98.51%)                                          | 0.9775     | 516(98.47%)                                       | 3803(96.99%)                                          | 0.8441     |
| Renal                     | 102(19.46%)                                       | 333(12.70%)                                           | 0.0006***  | 102(19.46%)                                       | 137(3.49%)                                            | <0.0001*** |
| Endocrine                 | 10(1.90%)                                         | 50(1.90%)                                             | 1.0000     | 10(1.90%)                                         | 29(0.73%)                                             | 0.0159*    |
| Diabetes mellitus         | 136(25.95%)                                       | 650(24.80%)                                           | 0.7089     | 136(25.95%)                                       | 371(9.46%)                                            | <0.0001*** |
| Hypertension              | 209(39.88%)                                       | 1026(39.16%)                                          | 0.8732     | 209(39.88%)                                       | 495(12.62%)                                           | <0.0001*** |
| Gastrointestinal          | 510(97.32%)                                       | 2551(97.36%)                                          | 0.9774     | 510(97.32%)                                       | 3781(96.42%)                                          | 0.9149     |
| Stroke                    | 90(17.17%)                                        | 319(12.17%)                                           | 0.0089**   | 90(17.17%)                                        | 101(2.57%)                                            | <0.0001*** |
| <b>Hospitalization</b>    |                                                   |                                                       |            |                                                   |                                                       |            |
| Episodes number           | 1(1-2);98; n=524                                  | 1(1-2);17; n=2513                                     | 0.7826     | 1(1-2);98; n=524                                  | 1(1-2);17; n=3760                                     | <0.0001*** |

|                               |                             |                             |            |                             |                             |            |
|-------------------------------|-----------------------------|-----------------------------|------------|-----------------------------|-----------------------------|------------|
| Length of hospital stay, days | 19(13-29.5);326; n=524      | 13(10-19);134; n=2513       | <0.0001*** | 19(13-29.5);326; n=524      | 12(8-17);351; n=3760        | <0.0001*** |
| Emergency readmission times   | 2(1-3);32; n=88             | 1(1-2);13; n=130            | 0.01*      | 2(1-3);32; n=88             | 1(1-2);13; n=101            | 0.0005***  |
| <b>Medications</b>            |                             |                             |            |                             |                             |            |
| PPIs dosage, mg               | 1080(600-2430);20880; n=524 | -                           | -          | 1080(600-2430);20880; n=524 | -                           | -          |
| Famotidine                    | 135(25.76%)                 | 615(23.47%)                 | 0.4117     | 135(25.76%)                 | 384(9.79%)                  | <0.0001*** |
| Famotidine dosage, mg         | 680(280-1810);43520; n=135  | 1560(920-4000);24320; n=615 | <0.0001*** | 680(280-1810);43520; n=135  | 1200(600-2520);24320; n=384 | 0.0006***  |
| ACEI                          | 91(17.36%)                  | 376(14.35%)                 | 0.1481     | 91(17.36%)                  | 160(4.08%)                  | <0.0001*** |
| ARB                           | 75(14.31%)                  | 367(14.00%)                 | 0.9274     | 75(14.31%)                  | 167(4.25%)                  | <0.0001*** |
| Steroid                       | 115(21.94%)                 | 441(16.83%)                 | 0.0245*    | 115(21.94%)                 | 517(13.18%)                 | <0.0001*** |
| Kaletra                       | 71(13.54%)                  | 69(2.63%)                   | <0.0001*** | 71(13.54%)                  | 31(0.79%)                   | <0.0001*** |
| Ribavirin                     | 204(38.93%)                 | 864(32.97%)                 | 0.0766     | 204(38.93%)                 | 923(23.53%)                 | <0.0001*** |
| Interferon beta-1B            | 401(76.52%)                 | 1925(73.47%)                | 0.6012     | 401(76.52%)                 | 1464(37.33%)                | <0.0001*** |
| hydroxychloroquine            | 21(4.00%)                   | 100(3.81%)                  | 0.9401     | 21(4.00%)                   | 71(1.81%)                   | 0.0022**   |
| Calcium channel blockers      | 217(41.41%)                 | 1054(40.22%)                | 0.7774     | 217(41.41%)                 | 538(13.72%)                 | <0.0001*** |
| Beta blockers                 | 119(22.70%)                 | 474(18.09%)                 | 0.0508     | 119(22.70%)                 | 209(5.33%)                  | <0.0001*** |
| Diuretics for heart failure   | 115(21.94%)                 | 234(8.93%)                  | <0.0001*** | 115(21.94%)                 | 78(1.98%)                   | <0.0001*** |

|                                   |                                 |                              |            |                                 |                                 |            |
|-----------------------------------|---------------------------------|------------------------------|------------|---------------------------------|---------------------------------|------------|
| Diuretics for hypertension        | 7(1.33%)                        | 35(1.33%)                    | 1.0000     | 7(1.33%)                        | 8(0.20%)                        | 0.0002***  |
| Nitrates                          | 19(3.62%)                       | 91(3.47%)                    | 0.9701     | 19(3.62%)                       | 18(0.45%)                       | <0.0001*** |
| Other antihypertensives           | 70(13.35%)                      | 227(8.66%)                   | 0.0034**   | 70(13.35%)                      | 80(2.04%)                       | <0.0001*** |
| <b>Complete blood count tests</b> |                                 |                              |            |                                 |                                 |            |
| MCV, fL                           | 87.745(84.6-91.2);110.6; n=404  | 87.4(83.8-91);102.1; n=2056  | 0.1132     | 87.745(84.6-91.2);110.6; n=404  | 86.6(82.7-89.835);104.5; n=2535 | <0.0001*** |
| Basophil, x10 <sup>9</sup> /L     | 0.01(0-0.02);0.13; n=464        | 0.01(0-0.02);0.19; n=2366    | 0.1429     | 0.01(0-0.02);0.13; n=464        | 0.01(0-0.02);0.2; n=3220        | 0.0041**   |
| Eosinophil, x10 <sup>9</sup> /L   | 0.009(0-0.0445);1.25; n=486     | 0.01(0-0.08);0.953; n=2445   | 0.6216     | 0(0-0.0445);1.25; n=486         | 0.04(0-0.1);2.25; n=3353        | <0.0001*** |
| Lymphocyte, x10 <sup>9</sup> /L   | 1(0.7-1.43);3.2; n=486          | 1.2(0.88-1.6);16.99; n=2445  | <0.0001*** | 1(0.7-1.43);3.2; n=486          | 1.42(1.05-1.9);16.99; n=3362    | <0.0001*** |
| Monocyte, x10 <sup>9</sup> /L     | 0.5(0.3605-0.68);3.26; n=486    | 0.5(0.39-0.68);2.1; n=2445   | 0.4243     | 0.5(0.3605-0.68);3.26; n=486    | 0.5(0.3795-0.62);2.32; n=3362   | 0.5017     |
| Neutrophil, x10 <sup>9</sup> /L   | 3.805(2.74-5.0985);27.17; n=486 | 3.36(2.46-4.4);15.82; n=2445 | <0.0001*** | 3.805(2.74-5.0985);27.17; n=486 | 3.2(2.37-4.235);15.82; n=3362   | <0.0001*** |
| WBC, x10 <sup>9</sup> /L          | 5.6(4.4-7.12);29.64; n=493      | 5.2(4.16-6.6);23.9; n=2458   | 0.0007***  | 5.6(4.4-7.12);29.64; n=493      | 5.4(4.3-6.7);23.9; n=3425       | 0.0149*    |
| MCH, g/dL                         | 30.1(28.7-31.2);36.8; n=493     | 29.9(28.4-31.1);34.7; n=2458 | 0.0697     | 30.1(28.7-31.2);36.8; n=493     | 29.65(28.2-30.7);36.1; n=3425   | <0.0001*** |
| Platelet, x10 <sup>9</sup> /L     | 194.5(151.5-240);778; n=492     | 200(162-246.5);670; n=2458   | 0.0592     | 194.5(151.5-240);778; n=492     | 220(180-276);773; n=3425        | <0.0001*** |

|                                |                                       |                                   |            |                                       |                                       |            |
|--------------------------------|---------------------------------------|-----------------------------------|------------|---------------------------------------|---------------------------------------|------------|
| RBC, x10 <sup>12</sup> /L      | 4.49(4.05-4.83);6.08;<br>n=493        | 4.59(4.23-4.99);7.24;<br>n=2458   | <0.0001*** | 4.49(4.05-4.83);6.08;<br>n=493        | 4.7195(4.37-5.1);7.45;<br>n=3426      | <0.0001*** |
| HCT, L/L                       | 0.39(0.35-0.42);0.516;<br>n=441       | 0.399(0.37-0.42);0.501;<br>n=2037 | 0.0002**   | 0.391(0.353-<br>0.42);0.516; n=441    | 0.404(0.376-<br>0.433);0.5287; n=2944 | <0.0001*** |
| <b>Biochemical tests</b>       |                                       |                                   |            |                                       |                                       |            |
| Potassium, mmol/L              | 3.8(3.5-4.1);5.9; n=426               | 3.88(3.5-4.2);5.59;<br>n=2036     | 0.0512     | 3.8(3.5-4.1);5.9; n=426               | 3.8(3.6-4.1);5.74;<br>n=2569          | 0.1035     |
| Urate, mmol/L                  | 0.32(0.25-0.47);0.62;<br>n=38         | 0.31(0.23-0.4);0.64;<br>n=119     | 0.5785     | 0.32(0.25-0.47);0.62;<br>n=38         | 0.3(0.24-0.38);0.64;<br>n=89          | 0.2521     |
| Albumin, g/L                   | 36.1(31-40.73);144.5;<br>n=426        | 39(35-43.1);146;<br>n=2038        | <0.0001*** | 36.1(31-40.725);144.5;<br>n=426       | 41(37.7-44.1);146;<br>n=2575          | <0.0001*** |
| Sodium, mmol/L                 | 137.7(134.53-<br>140.6);147.49; n=427 | 138(135.7-140.2);147;<br>n=2039   | 0.0141     | 137.7(134.53-<br>140.6);147.49; n=427 | 139(137-140.7);149.42;<br>n=2575      | <0.0001*** |
| Urea, mmol/L                   | 5(3.8-7.01);39.6; n=427               | 4.4(3.5-5.6);25.53;<br>n=2039     | <0.0001*** | 5(3.8-7.01);39.6; n=427               | 3.8(3.04-4.75);41.95;<br>n=2573       | <0.0001*** |
| Protein, g/L                   | 71.7(67-76);93.2;<br>n=354            | 73(69-77);92.7; n=1813            | <0.0001*** | 71.7(67-76);93.2;<br>n=354            | 74(70.7-77.9);92.7;<br>n=2329         | <0.0001*** |
| Creatinine, umol/L             | 79(63-99.75);1280;<br>n=427           | 75.2(64-90.4);461;<br>n=2039      | 0.0033**   | 79(63-99.75);1280;<br>n=427           | 69(58-82);461; n=2575                 | <0.0001*** |
| Alkaline<br>phosphatase, U/L   | 67(56-85);872; n=423                  | 66(56-80);932; n=2010             | 0.1316     | 67(56-85);872; n=423                  | 64.4(53-80);932; n=2565               | 0.0122*    |
| Aspartate<br>transaminase, U/L | 32.8(24-53.8);1713;<br>n=195          | 29(21.9-44);1807.4;<br>n=704      | 0.0037**   | 32.8(24-53.8);1713;<br>n=195          | 26(21-38);1807.4; n=797               | <0.0001*** |



|                                 |                                 |                                |            |                                 |                                  |            |
|---------------------------------|---------------------------------|--------------------------------|------------|---------------------------------|----------------------------------|------------|
| Alanine aminotransferase, U/L   | 29(18-42);380; n=361            | 26(19-40);197.2; n=1619        | 0.1306     | 29(18-42);380; n=361            | 22(16-33.5);583; n=2065          | <0.0001*** |
| Bilirubin, umol/L               | 8.7(6-12);235; n=423            | 8.2(6.3-12);104.2; n=2009      | 0.7284     | 8.7(6-12);235; n=423            | 7.6(5.4-10.7);104.2; n=2564      | <0.0001*** |
| Glucose, mmol/L                 | 6.4(5.5-8);29.3; n=445          | 6(5.3-7.5);26.5; n=2091        | 0.0015**   | 6.4(5.5-8);29.3; n=445          | 5.5(5-6.6);26.8; n=2500          | <0.0001*** |
| <b>Diabetes mellitus tests</b>  |                                 |                                |            |                                 |                                  |            |
| HbA1c, g/dL                     | 13.1(11.5-14.3);17.5; n=493     | 13.2(11.265-14.3);17.4; n=2458 | 0.9348     | 13.1(11.5-14.3);17.5; n=493     | 13.5(12.2-14.6);18.1; n=3426     | <0.0001*** |
| Cholesterol, mmol/L             | 3.671(2.31-4.7);7.436; n=199    | 3.7(1.895-4.53);9.718; n=807   | 0.7603     | 3.671(2.31-4.7);7.436; n=199    | 3.94(2.885-4.9);9.718; n=464     | 0.009**    |
| D-dimer, ng/mL                  | 455.765(190-878.5);11200; n=138 | 400(190-810.51);4340; n=551    | 0.5681     | 455.765(190-878.5);11200; n=138 | 280(163.5-494.01);6579.87; n=667 | <0.0001*** |
| High sensitive troponin-I, ng/L | 6.56(2.43-17.75);3876.3; n=226  | 4.9(2.55-8.48);93.6; n=760     | 0.0003***  | 6.56(2.4-17.75);3876.3; n=226   | 3(0.95-5.73);115.3; n=1005       | <0.0001*** |
| Lactate dehydrogenase, U/L      | 247(198-341);1096; n=428        | 214.5(182-268);1374; n=1998    | <0.0001*** | 247(198-341);1096; n=428        | 191(162.9-231);1374; n=2728      | <0.0001*** |
| APTT, second                    | 31.4(27.7-34.9);120; n=375      | 30.8(27.5-34.2);55.2; n=1551   | 0.1717     | 31.4(27.7-34.9);120; n=375      | 30.9(27.6-34.4);55.2; n=1678     | 0.2798     |
| Prothrombin Time/INR, second    | 12.1(11.5-12.9);28.5; n=278     | 11.9(11.4-12.5);26.8; n=1006   | 0.0013**   | 12.1(11.5-12.9);28.5; n=278     | 12(11.4-12.6);43.4; n=1177       | 0.0172     |
| C-reactive protein, mg/dL       | 1.8(0.5-6);34; n=491            | 0.9(0.3-2.9);34; n=2450        | <0.0001*** | 1.77(0.479-5.975);34; n=491     | 0.311(0.1-0.972);33.99; n=3363   | <0.0001*** |
| <b>Blood gas tests</b>          |                                 |                                |            |                                 |                                  |            |

|                                       |                                 |                                 |          |                               |                               |          |
|---------------------------------------|---------------------------------|---------------------------------|----------|-------------------------------|-------------------------------|----------|
| HCO <sub>3</sub> /Bicarbonate, mmol/L | 23(20.7-24.9);32.8;<br>n=98     | 23.6(20-24.8);29.5;<br>n=103    | 0.6535   | 23(20.7-24.9);32.8;<br>n=98   | 23.6(19.8-25.3);29.5;<br>n=69 | 0.9948   |
| Base excess, mmol/L                   | -0.9(-3-1.2);9.5; n=253         | -0.1(-2.4-1.95);7.2;<br>n=391   | 0.0028** | -0.9(-3-1.2);9.5; n=253       | -0.1(-2.1-1.9);7.2; n=259     | 0.0021** |
| Blood pCO <sub>2</sub> , kPa          | 4.8(4.03-5.62);10.94;<br>n=253  | 4.68(4.08-5.55);7.72;<br>n=391  | 0.5422   | 4.8(4.03-5.6);10.9;<br>n=253  | 4.9(4.3-5.8);8.3; n=260       | 0.1698   |
| Blood pH                              | 7.423(7.371-7.473);7.612; n=253 | 7.4435(7.394-7.469);7.57; n=396 | 0.005**  | 7.42(7.4-7.5);7.6;<br>n=253   | 7.43(7.4-7.5);7.6; n=260      | 0.5672   |
| Calcium, mmol/L                       | 1.135(1.06-1.175);1.33;<br>n=28 | 1.13(1.125-1.15);1.17;<br>n=4   | 0.8194   | 1.14(1.06-1.18);1.33;<br>n=28 | 1.13(1.12-1.19);1.31;<br>n=8  | 0.4235   |

**Supplementary Table 6. Baseline clinical characteristics of patients with or without famotidine use before and after propensity score matching (1:5)**\* for  $p \leq 0.05$ , \*\* for  $p \leq 0.01$ , \*\*\* for  $p \leq 0.001$ 

| Characteristics           | After 1:5 matching                                            |                                                                      |            | Before matching                                            |                                                                |            |
|---------------------------|---------------------------------------------------------------|----------------------------------------------------------------------|------------|------------------------------------------------------------|----------------------------------------------------------------|------------|
|                           | Famotidine (N=519)<br>Median<br>(IQR);Max;N<br>or<br>Count(%) | No famotidine<br>(N=2595)<br>Median<br>(IQR);Max;N<br>or<br>Count(%) | P value    | Famotidine (N=519)<br>Median (IQR);Max;N<br>or<br>Count(%) | No famotidine (N=3926)<br>Median (IQR);Max;N<br>or<br>Count(%) | P value    |
| <b>Demographics</b>       |                                                               |                                                                      |            |                                                            |                                                                |            |
| Male gender               | 242(46.62%)                                                   | 1234(47.55%)                                                         | 0.8508     | 242(46.62%)                                                | 1987(50.61%)                                                   | 0.3410     |
| Age, years                | 60.4(47.7-70.1);97.6;<br>n=519                                | 58.1(45.2-67.2);96.6;<br>n=2595                                      | 0.0052**   | 60.4(47.7-70.0472);97.6;<br>n=519                          | 42.3(27.5-58.9);100.6;<br>n=3926                               | <0.0001*** |
| <b>Past comorbidities</b> |                                                               |                                                                      |            |                                                            |                                                                |            |
| Cardiovascular            | 98(18.88%)                                                    | 359(13.83%)                                                          | 0.014*     | 98(18.88%)                                                 | 225(5.73%)                                                     | <0.0001*** |
| Respiratory               | 512(98.65%)                                                   | 2560(98.65%)                                                         | 1.0000     | 512(98.65%)                                                | 3807(96.96%)                                                   | 0.8210     |
| Renal                     | 57(10.98%)                                                    | 242(9.32%)                                                           | 0.3290     | 57(10.98%)                                                 | 182(4.63%)                                                     | <0.0001*** |
| Endocrine                 | 7(1.34%)                                                      | 35(1.34%)                                                            | 1.0000     | 7(1.34%)                                                   | 32(0.81%)                                                      | 0.3360     |
| Diabetes mellitus         | 121(23.31%)                                                   | 528(20.34%)                                                          | 0.2451     | 121(23.31%)                                                | 386(9.83%)                                                     | <0.0001*** |
| Hypertension              | 171(32.94%)                                                   | 799(30.78%)                                                          | 0.5162     | 171(32.94%)                                                | 533(13.57%)                                                    | <0.0001*** |
| Gastrointestinal          | 508(97.88%)                                                   | 2540(97.88%)                                                         | 1.0000     | 508(97.88%)                                                | 3783(96.35%)                                                   | 0.8393     |
| Stroke                    | 83(15.99%)                                                    | 227(8.74%)                                                           | <0.0001*** | 83(15.99%)                                                 | 108(2.75%)                                                     | <0.0001*** |
| <b>Hospitalization</b>    |                                                               |                                                                      |            |                                                            |                                                                |            |

|                               |                             |                             |            |                             |                             |            |
|-------------------------------|-----------------------------|-----------------------------|------------|-----------------------------|-----------------------------|------------|
| Episodes number               | 1(1-2);17; n=519            | 1(1-2);25; n=2515           | 0.0004***  | 1(1-2);17; n=519            | 1(1-2);98; n=3765           | <0.0001*** |
| Length of hospital stay, days | 17(11.5-25);178; n=519      | 13(9-20);199; n=2515        | <0.0001*** | 17(11.5-25);178; n=519      | 12(8-18);351; n=3765        | <0.0001*** |
| Emergency readmission times   | 2(1-3);10; n=45             | 1(1-2);13; n=169            | 0.0502     | 2(1-3);10; n=45             | 1(1-2);32; n=144            | 0.0639     |
| <b>Medications</b>            |                             |                             |            |                             |                             |            |
| PPIs                          | 135(26.01%)                 | 557(21.46%)                 | 0.0824     | 135(26.01%)                 | 389(9.90%)                  | <0.0001*** |
| PPIs dosage, mg               | 1040(540-2040);20880; n=135 | 1280(720-2960);19320; n=557 | 0.0188*    | 1040(540-2040);20880; n=135 | 1120(640-2600);19320; n=389 | 0.2851     |
| Famotidine dosage, mg         | 1040(480-2440);43520; n=519 | -                           | -          | 1040(480-2440);43520; n=519 | -                           | -          |
| ACEI                          | 72(13.87%)                  | 295(11.36%)                 | 0.1767     | 72(13.87%)                  | 179(4.55%)                  | <0.0001*** |
| ARB                           | 60(11.56%)                  | 274(10.55%)                 | 0.5990     | 60(11.56%)                  | 182(4.63%)                  | <0.0001*** |
| Steroid                       | 110(21.19%)                 | 486(18.72%)                 | 0.3138     | 110(21.19%)                 | 522(13.29%)                 | <0.0001*** |
| Kaletra                       | 28(5.39%)                   | 92(3.54%)                   | 0.0739     | 28(5.39%)                   | 74(1.88%)                   | <0.0001*** |
| Ribavirin                     | 185(35.64%)                 | 858(33.06%)                 | 0.4531     | 185(35.64%)                 | 942(23.99%)                 | <0.0001*** |
| Interferon beta-1B            | 366(70.52%)                 | 1768(68.13%)                | 0.6725     | 366(70.52%)                 | 1499(38.18%)                | <0.0001*** |
| hydroxychloroquine            | 13(2.50%)                   | 64(2.46%)                   | 0.9168     | 13(2.50%)                   | 79(2.01%)                   | 0.5751     |
| Calcium channel blockers      | 172(33.14%)                 | 849(32.71%)                 | 0.9322     | 172(33.14%)                 | 583(14.84%)                 | <0.0001*** |
| Beta blockers                 | 98(18.88%)                  | 368(14.18%)                 | 0.0238     | 98(18.88%)                  | 230(5.85%)                  | <0.0001*** |
| Diuretics for heart failure   | 51(9.82%)                   | 218(8.40%)                  | 0.3795     | 51(9.82%)                   | 142(3.61%)                  | <0.0001*** |

|                                   |                              |                               |           |                              |                               |            |
|-----------------------------------|------------------------------|-------------------------------|-----------|------------------------------|-------------------------------|------------|
| Diuretics for hypertension        | 3(0.57%)                     | 15(0.57%)                     | 1.0000    | 3(0.57%)                     | 12(0.30%)                     | 0.5492     |
| Nitrates                          | 12(2.31%)                    | 60(2.31%)                     | 1.0000    | 12(2.31%)                    | 25(0.63%)                     | 0.0003***  |
| Other antihypertensives           | 33(6.35%)                    | 146(5.62%)                    | 0.6077    | 33(6.35%)                    | 117(2.98%)                    | 0.0002***  |
| <b>Complete blood count tests</b> |                              |                               |           |                              |                               |            |
| MCV, fL                           | 87.4(83.5-91.3);105.4; n=360 | 87.5(84.3-90.9);110.6; n=1920 | 0.4499    | 87.4(83.5-91.3);105.4; n=360 | 86.7(83-89.9);110.6; n=2579   | 0.0216*    |
| Basophil, x10 <sup>9</sup> /L     | 0.009(0-0.02);0.19; n=469    | 0.01(0-0.02);0.13; n=2308     | 0.0411*   | 0.009(0-0.02);0.19; n=469    | 0.01(0-0.02);0.2; n=3215      | <0.0001*** |
| Eosinophil, x10 <sup>9</sup> /L   | 0.01(0-0.07);0.8; n=482      | 0.01(0-0.08);1.16; n=2398     | 0.7821    | 0.01(0-0.0655);0.8; n=482    | 0.04(0-0.1);2.25; n=3357      | <0.0001*** |
| Lymphocyte, x10 <sup>9</sup> /L   | 1.13(0.8-1.55);4.66; n=483   | 1.22(0.9-1.62);14.8; n=2398   | 0.0005*** | 1.13(0.8-1.55);4.66; n=483   | 1.41(1.016-1.9);16.99; n=3365 | <0.0001*** |
| Monocyte, x10 <sup>9</sup> /L     | 0.48(0.33-0.64);1.45; n=483  | 0.5(0.38-0.68);1.7; n=2398    | 0.0218*   | 0.48(0.33-0.64);1.45; n=483  | 0.5(0.38-0.63);3.26; n=3365   | 0.1153     |
| Neutrophil, x10 <sup>9</sup> /L   | 3.4(2.4-4.32);15.9; n=483    | 3.3(2.4-4.5);17.97; n=2398    | 0.4735    | 3.4(2.4-4.32);15.9; n=483    | 3.27(2.4-4.38);27.17; n=3365  | 0.7461     |
| WBC, x10 <sup>9</sup> /L          | 5.16(4.029-6.26);17.9; n=489 | 5.32(4.3-6.7);23.9; n=2421    | 0.0145*   | 5.16(4.029-6.26);17.9; n=489 | 5.47(4.38-6.8);29.64; n=3429  | 0.0002***  |
| MCH, g/dL                         | 29.8(28.1-31);36.8; n=489    | 29.9(28.6-31);35.9; n=2421    | 0.1682    | 29.8(28.1-31);36.8; n=489    | 29.7(28.3-30.7);35.9; n=3429  | 0.2134     |
| Platelet, x10 <sup>9</sup> /L     | 199(160-241.75);773; n=488   | 206(166-257);778; n=2420      | 0.0128*   | 199(160-241.75);773; n=488   | 220(179-276);778; n=3429      | <0.0001*** |

|                                |                                        |                                  |          |                                     |                                        |            |
|--------------------------------|----------------------------------------|----------------------------------|----------|-------------------------------------|----------------------------------------|------------|
| RBC, x10 <sup>12</sup> /L      | 4.51(4.17-4.89);6.97;<br>n=489         | 4.61(4.27-4.96);7.3;<br>n=2421   | 0.0015** | 4.51(4.17-4.89);6.97;<br>n=489      | 4.7(4.4-5.1);7.45; n=3430              | <0.0001*** |
| HCT, L/L                       | 0.39(0.36-0.42);0.49;<br>n=420         | 0.4(0.37-0.43);0.51;<br>n=2012   | 0.1521   | 0.39(0.36-0.42);0.49;<br>n=420      | 0.40(0.38-0.43);0.53;<br>n=2965        | <0.0001*** |
| <b>Biochemical tests</b>       |                                        |                                  |          |                                     |                                        |            |
| Potassium, mmol/L              | 3.8(3.5-4.1);5.67;<br>n=432            | 3.8(3.5-4.1);5.9;<br>n=1937      | 0.8758   | 3.8(3.5-4.1);5.67; n=432            | 3.8(3.59-4.1);5.9; n=2563              | 0.4478     |
| Urate, mmol/L                  | 0.37(0.31-<br>0.45);0.621; n=25        | 0.31(0.24-<br>0.39);0.635; n=120 | 0.0355*  | 0.37(0.3056-0.45);0.621;<br>n=25    | 0.2875(0.2375-<br>0.3685);0.635; n=102 | 0.0038**   |
| Albumin, g/L                   | 39(35-42.3);141.36;<br>n=434           | 39(34.75-43.6);146;<br>n=1936    | 0.0462*  | 39(35-42.25);141.36;<br>n=434       | 41(37-44.1);146; n=2567                | <0.0001*** |
| Sodium, mmol/L                 | 138(135.1-<br>140.35);147.49;<br>n=432 | 138.6(136-141);147;<br>n=1941    | 0.0366*  | 138(135.1-<br>140.35);147.49; n=432 | 139(137-140.7);149.42;<br>n=2570       | <0.0001*** |
| Urea, mmol/L                   | 4.3(3.22-5.6);36.2;<br>n=432           | 4.3(3.3-5.5);39.6;<br>n=1940     | 0.8508   | 4.3(3.22-5.6);36.2; n=432           | 3.9(3.1-4.845);41.95;<br>n=2568        | <0.0001*** |
| Protein, g/L                   | 72.9(68.8-77.3);93.2;<br>n=373         | 73.84(70-77);92.24;<br>n=1690    | 0.0768   | 72.9(68.8-77.3);93.2;<br>n=373      | 74(70.4-77.5);92.7;<br>n=2310          | 0.0007***  |
| Creatinine, umol/L             | 71.05(61-86.5);1280;<br>n=432          | 73(59-87.7);530;<br>n=1941       | 0.9300   | 71.05(61-86.5);1280;<br>n=432       | 69.75(58-84);1216.2;<br>n=2570         | 0.0058**   |
| Alkaline<br>phosphatase, U/L   | 65(54-80);932; n=430                   | 65(54.05-78);282;<br>n=1923      | 0.5686   | 65(54-80);932; n=430                | 65(53.95-80);550; n=2558               | 0.9157     |
| Aspartate<br>transaminase, U/L | 29(22-49);1807.4;<br>n=173             | 28(21-41);427.6;<br>n=724        | 0.1007   | 29(22-49);1807.4; n=173             | 26.1(21-39);863; n=819                 | 0.0056**   |

|                                 |                                |                               |           |                                |                                 |            |
|---------------------------------|--------------------------------|-------------------------------|-----------|--------------------------------|---------------------------------|------------|
| Alanine aminotransferase, U/L   | 23(16-36.3);380; n=348         | 25(18-38);275; n=1553         | 0.0113*   | 23(16-36.3);380; n=348         | 23(16-35);583; n=2078           | 0.8508     |
| Bilirubin, umol/L               | 7.8(5.8-11.8);56.5; n=429      | 8(6-11.1);179.7; n=1923       | 0.7129    | 7.8(5.8-11.8);56.5; n=429      | 7.8(5.5-10.8);235; n=2558       | 0.1297     |
| Glucose, mmol/L                 | 5.9(5.3-7.4);26.5; n=425       | 6(5.3-7.4);29.29; n=2026      | 0.7784    | 5.86(5.26-7.4);26.5; n=425     | 5.58(5-6.7);29.29; n=2520       | <0.0001*** |
| <b>Diabetes mellitus tests</b>  |                                |                               |           |                                |                                 |            |
| HbA1c, g/dL                     | 13(11.4-14.1);17.1; n=489      | 13.3(11.6-14.3);17.7; n=2421  | 0.0228*   | 13(11.4-14.1);17.1; n=489      | 13.5(12.2-14.665);18.07; n=3430 | <0.0001*** |
| Cholesterol, mmol/L             | 3.8(2.8-4.6);7.6; n=159        | 3.7(1.9-4.6);8.7; n=638       | 0.4579    | 3.8(2.8-4.6);7.559; n=159      | 3.9(2.6-4.9);9.718; n=504       | 0.4820     |
| D-dimer, ng/mL                  | 369(220.5-743.6);6544.8; n=124 | 360(185.4-699.8);11200; n=559 | 0.2653    | 369(220.5-743.6);6544.8; n=124 | 280(152.7-540.01);11200; n=681  | 0.0006***  |
| High sensitive troponin-I, ng/L | 4.8(2-10);400.2; n=200         | 4.5(1.9-10);3876.3; n=790     | 0.4090    | 4.772(2-10);400.2; n=200       | 3(1-6.29);3876.3; n=1031        | <0.0001*** |
| Lactate dehydrogenase, U/L      | 219(180.5-281.5);1116; n=411   | 210(174-266);874; n=1994      | 0.0063**  | 219(180.5-281.5);1116; n=411   | 194(164-236);1374; n=2745       | <0.0001*** |
| APTT, second                    | 31.6(27.9-34.8);66.4; n=319    | 30.2(27.1-33.6);120; n=1480   | 0.0005*** | 31.6(27.9-34.8);66.4; n=319    | 30.8(27.6-34.4);120; n=1734     | 0.1432     |
| Prothrombin Time/INR, second    | 12(11.35-12.55);43.4; n=220    | 11.9(11.4-12.5);31.7; n=968   | 0.9726    | 12(11.35-12.55);43.4; n=220    | 12(11.5-12.6);31.7; n=1235      | 0.2356     |
| C-reactive protein, mg/dL       | 0.81(0.26-2.864);34; n=492     | 0.61(0.24-2.2);28.4; n=2400   | 0.0608    | 0.81(0.26-2.864);34; n=492     | 0.314(0.11-1.18);29.818; n=3362 | <0.0001*** |

| <b>Blood gas tests</b>                |                            |                           |         |                               |                                |        |
|---------------------------------------|----------------------------|---------------------------|---------|-------------------------------|--------------------------------|--------|
| HCO <sub>3</sub> /Bicarbonate, mmol/L | 23.8(19.9-26);30.7; n=45   | 23(21.3-24.8);31; n=151   | 0.4424  | 23.8(19.9-26);30.7; n=45      | 22.65(20.25-24.65);32.8; n=122 | 0.2187 |
| Base excess, mmol/L                   | -0.4(-2.7-1.65);6.1; n=135 | -0.8(-2.2-1.9);9.5; n=413 | 0.9523  | -0.4(-2.7-1.65);6.1; n=135    | -0.5(-2.5-1.5);9.5; n=377      | 0.6725 |
| Blood pCO <sub>2</sub> , kPa          | 4.8(4.1-5.7);10.9; n=135   | 4.8(4.1-5.5);10.7; n=414  | 0.9430  | 4.78(4.07-5.675);10.94; n=135 | 4.895(4.15-5.73);10.65; n=378  | 0.6196 |
| Blood pH                              | 7.4(7.4-7.5);7.6; n=135    | 7.4(7.39-7.5);7.6; n=414  | 0.4179  | 7.42(7.38-7.5);7.6; n=135     | 7.42(7.38-7.47);7.6; n=378     | 0.8737 |
| Calcium, mmol/L                       | 1.1(0.99-1.2);1.2; n=8     | 1.17(1.1-1.19);1.3; n=32  | 0.0484* | 1.095(0.99-1.15);1.19; n=8    | 1.135(1.1-1.185);1.33; n=28    | 0.1227 |



**Supplementary Table 7. Composite risk of meeting the primary outcome among hospitalized Covid-19 patients after propensity score matching (1:5).**\* for  $p \leq 0.05$ , \*\* for  $p \leq 0.01$ , \*\*\* for  $p \leq 0.001$ 

| <b>Characteristics</b>    | <b>Famotidine vs Control<br/>HR [95% CI]</b> | <b>P value</b> | <b>PPIs vs Control<br/>HR [95% CI]</b> | <b>P value</b> |
|---------------------------|----------------------------------------------|----------------|----------------------------------------|----------------|
| PPIs/Control              | -                                            | -              | 6.32[5.02, 7.95]                       | <0.0001***     |
| PPIs dosage, mg           | -                                            | -              | 1.00[1.00, 1.00]                       | <0.0001***     |
| Famotidine/Control        | 1.98[1.47, 2.66]                             | <0.0001***     | -                                      | -              |
| Famotidine dosage, mg     | 1.00[1.00, 1.00]                             | 0.009**        | -                                      | -              |
| <b>Demographics</b>       |                                              |                |                                        |                |
| Male gender               | 1.69[1.33, 2.14]                             | <0.0001***     | 2.47[1.83, 3.35]                       | <0.0001***     |
| Age, years                | 1.05[1.05, 1.06]                             | <0.0001***     | 1.06[1.05, 1.07]                       | <0.0001***     |
| <b>Past comorbidities</b> |                                              |                |                                        |                |
| Cardiovascular            | 1.91[1.50, 2.42]                             | <0.0001***     | 2.23[1.63, 3.04]                       | <0.0001***     |
| Respiratory               | 3.34[1.23, 9.09]                             | 0.0183*        | 2.46[0.60, 10.13]                      | 0.214          |
| Renal                     | 2.89[2.28, 3.66]                             | <0.0001***     | 4.06[2.97, 5.54]                       | <0.0001***     |
| Endocrine                 | 1.25[0.59, 2.64]                             | 0.563          | 2.14[0.88, 5.21]                       | 0.0927.        |
| Diabetes mellitus         | 1.73[1.38, 2.18]                             | <0.0001***     | 1.95[1.44, 2.64]                       | <0.0001***     |
| Hypertension              | 2.13[1.70, 2.65]                             | <0.0001***     | 2.42[1.83, 3.22]                       | <0.0001***     |
| Gastrointestinal          | 2.05[1.07, 3.93]                             | 0.0304*        | 1.93[0.70, 5.35]                       | 0.204          |
| Stroke                    | 2.14[1.66, 2.76]                             | <0.0001***     | 2.26[1.61, 3.19]                       | <0.0001***     |
| <b>Hospitalizations</b>   |                                              |                |                                        |                |
| Episodes number           | 1.04[1.02, 1.05]                             | <0.0001***     | 1.18[1.13, 1.23]                       | <0.0001***     |

|                                   |                     |            |                       |            |
|-----------------------------------|---------------------|------------|-----------------------|------------|
| Length of hospital stay, days     | 1.01[1.01, 1.02]    | <0.0001*** | 1.02[1.02, 1.03]      | <0.0001*** |
| Emergency readmission times       | 1.06[1.00, 1.13]    | 0.070      | 1.11[0.99, 1.25]      | 0.076      |
| <b>Medications</b>                |                     |            |                       |            |
| ACEI                              | 2.55[2.01, 3.23]    | <0.0001*** | 2.98[2.18, 4.09]      | <0.0001*** |
| ARB                               | 0.68[0.48, 0.97]    | 0.0349*    | 1.08[0.70, 1.65]      | 0.738      |
| Steroid                           | 0.79[0.57, 1.08]    | 0.135      | 0.51[0.32, 0.80]      | 0.0032**   |
| Kaletra                           | 16.44[12.85, 21.04] | <0.0001*** | 23.15[17.17, 31.22]   | <0.0001*** |
| Ribavirin                         | 1.05[0.82, 1.33]    | 0.717      | 0.84[0.62, 1.14]      | 0.266      |
| Interferon beta-1B                | 3.21[2.25, 4.57]    | <0.0001*** | 3.42[2.21, 5.27]      | <0.0001*** |
| Hydroxychloroquine                | 1.57[1.00, 2.44]    | 0.049*     | 3.80[2.33, 6.19]      | <0.0001*** |
| Calcium channel blockers          | 1.92[1.54, 2.39]    | <0.0001*** | 2.39[1.80, 3.18]      | <0.0001*** |
| Beta blockers                     | 1.61[1.26, 2.07]    | 0.0002***  | 1.76[1.27, 2.44]      | 0.0008***  |
| Diuretics for heart failure       | 7.20[5.77, 8.98]    | <0.0001*** | 11.03[8.29, 14.67]    | <0.0001*** |
| Diuretics for hypertension        | 2.13[1.13, 3.99]    | 0.019*     | 10.27[4.82, 21.88]    | <0.0001*** |
| Nitrates                          | 0.49[0.22, 1.11]    | 0.0876.    | 0.64[0.21, 2.01]      | 0.446      |
| Other antihypertensives           | 1.49[1.10, 2.02]    | 0.0109*    | 2.55[1.71, 3.80]      | <0.0001*** |
| <b>Complete blood count tests</b> |                     |            |                       |            |
| MCV, fL                           | 1.02[1.00, 1.03]    | 0.0663.    | 1.03[1.01, 1.06]      | 0.0077**   |
| Basophil, x10 <sup>9</sup> /L     | 1.97[0.01, 405.50]  | 0.803      | 1341[3.96, 453873.00] | 0.0154*    |
| Eosinophil, x10 <sup>9</sup> /L   | 0.07[0.01, 0.43]    | 0.0038**   | 0.02[0.00, 0.24]      | 0.0021**   |
| Lymphocyte, x10 <sup>9</sup> /L   | 0.33[0.25, 0.42]    | <0.0001*** | 0.26[0.19, 0.36]      | <0.0001*** |
| Monocyte, x10 <sup>9</sup> /L     | 2.35[1.65, 3.36]    | <0.0001*** | 2.14[1.21, 3.79]      | 0.0094**   |
| Neutrophil, x10 <sup>9</sup> /L   | 1.24[1.21, 1.27]    | <0.0001*** | 1.28[1.24, 1.32]      | <0.0001*** |

|                                 |                   |            |                   |            |
|---------------------------------|-------------------|------------|-------------------|------------|
| WBC, x10 <sup>9</sup> /L        | 1.17[1.14, 1.20]  | <0.0001*** | 1.18[1.15, 1.22]  | <0.0001*** |
| MCH, g/dL                       | 1.01[0.97, 1.05]  | 0.562      | 1.05[0.99, 1.11]  | 0.095      |
| Platelet, x10 <sup>9</sup> /L   | 1.00[1.00, 1.00]  | 0.0009***  | 1.00[0.99, 1.00]  | 0.0004***  |
| RBC, x10 <sup>12</sup> /L       | 0.58[0.49, 0.69]  | <0.0001*** | 0.57[0.45, 0.71]  | <0.0001*** |
| HCT, L/L                        | 0.01[0.00, 0.06]  | <0.0001*** | 0.00[0.00, 0.09]  | 0.0007***  |
| <b>Biochemical tests</b>        |                   |            |                   |            |
| Potassium, mmol/L               | 1.22[0.95, 1.56]  | 0.124      | 1.57[1.12, 2.19]  | 0.0086**   |
| Urate, mmol/L                   | 88.32[4.95, 1575] | 0.0023**   | 0.92[0.03, 29.11] | 0.964      |
| Albumin, g/L                    | 0.99[0.98, 1.00]  | 0.026*     | 0.99[0.98, 1.00]  | 0.0845.    |
| Sodium, mmol/L                  | 0.98[0.95, 1.01]  | 0.212      | 0.93[0.90, 0.97]  | 0.0004***  |
| Urea, mmol/L                    | 1.11[1.10, 1.13]  | <0.0001*** | 1.15[1.12, 1.17]  | <0.0001*** |
| Protein, g/L                    | 0.93[0.91, 0.95]  | <0.0001*** | 0.93[0.90, 0.95]  | <0.0001*** |
| Creatinine, umol/L              | 1.00[1.00, 1.00]  | <0.0001*** | 1.00[1.00, 1.01]  | <0.0001*** |
| Alkaline phosphatase, U/L       | 1.00[1.00, 1.01]  | <0.0001*** | 1.00[1.00, 1.01]  | <0.0001*** |
| Aspartate transaminase, U/L     | 1.00[1.00, 1.00]  | <0.0001*** | 1.00[1.00, 1.00]  | <0.0001*** |
| Alanine aminotransferase, U/L   | 1.01[1.00, 1.01]  | <0.0001*** | 1.01[1.01, 1.01]  | <0.0001*** |
| Bilirubin, umol/L               | 1.02[1.01, 1.02]  | <0.0001*** | 1.03[1.02, 1.03]  | <0.0001*** |
| Glucose, mmol/L                 | 1.15[1.12, 1.18]  | <0.0001*** | 1.15[1.11, 1.19]  | <0.0001*** |
| <b>Diabetes mellitus tests</b>  |                   |            |                   |            |
| HbA1c, g/dL                     | 0.93[0.91, 0.95]  | <0.0001*** | 0.95[0.93, 0.98]  | 0.0003***  |
| Cholesterol, mmol/L             | 1.02[0.92, 1.13]  | 0.692      | 0.98[0.86, 1.12]  | 0.743      |
| D-dimer, ng/mL                  | 1.00[1.00, 1.00]  | <0.0001*** | 1.00[1.00, 1.00]  | <0.0001*** |
| High sensitive troponin-I, ng/L | 1.001[1.0, 1.01]  | 0.205      | 1.00[1.00, 1.00]  | <0.0001*** |

|                                       |                   |            |                     |            |
|---------------------------------------|-------------------|------------|---------------------|------------|
| Lactate dehydrogenase, U/L            | 1.00[1.00, 1.00]  | <0.0001*** | 1.006[1.005, 1.006] | <0.0001*** |
| APTT, second                          | 1.04[1.03, 1.05]  | <0.0001*** | 1.04[1.03, 1.05]    | <0.0001*** |
| Prothrombin Time/INR, second          | 1.11[1.06, 1.17]  | <0.0001*** | 1.06[1.01, 1.11]    | 0.0129*    |
| C-reactive protein, mg/dL             | 1.10[1.09, 1.12]  | <0.0001*** | 1.12[1.11, 1.14]    | <0.0001*** |
| <b>Blood gas tests</b>                |                   |            |                     |            |
| HCO <sub>3</sub> /Bicarbonate, mmol/L | 0.94[0.88, 1.00]  | 0.0504     | 0.92[0.86, 0.99]    | 0.0215*    |
| Base excess, mmol/L                   | 0.88[0.85, 0.91]  | <0.0001*** | 0.92[0.88, 0.96]    | 0.0003***  |
| Blood pCO <sub>2</sub> , kPa          | 0.87[0.77, 0.98]  | 0.0179*    | 0.92[0.81, 1.05]    | 0.213      |
| Blood pH                              | 0.04[0.01, 0.21]  | 0.0002***  | 0.28[0.03, 2.34]    | 0.24       |
| Calcium, mmol/L                       | 0.86[0.01, 91.97] | 0.950      | 4.61[0.02, 860.40]  | 0.567      |

**Supplementary Table 8. Baseline clinical characteristics of patients with or without proton pump inhibitor (PPI) use before and after propensity score matching (1:1)**\* for  $p \leq 0.05$ , \*\* for  $p \leq 0.01$ , \*\*\* for  $p \leq 0.001$ 

| Characteristics           | After 1:1 matching                                |                                                            |               | Before matching                                   |                                                             |            |
|---------------------------|---------------------------------------------------|------------------------------------------------------------|---------------|---------------------------------------------------|-------------------------------------------------------------|------------|
|                           | PPIs (N=524)<br>Median<br>(IQR);Max;N<br>Count(%) | No PPIs (N=524)<br>Median<br>(IQR);Max;N<br>or<br>Count(%) | P value<br>or | PPIs (N=524)<br>Median<br>(IQR);Max;N<br>Count(%) | No PPIs (N=3921)<br>Median<br>(IQR);Max;N<br>or<br>Count(%) | P value    |
| <b>Demographics</b>       |                                                   |                                                            |               |                                                   |                                                             |            |
| Male gender               | 307(58.58%)                                       | 298(56.87%)                                                | 0.8101        | 307(58.58%)                                       | 1922(49.01%)                                                | 0.0228*    |
| Age, years                | 65.2(57.1-73.9);98.7;<br>n=524                    | 63.1(54.6-71.3);100.6;<br>n=524                            | 0.0067**      | 65.2(57.1-73.9);98.7;<br>n=524                    | 41(27.1-57.6);100.6;<br>n=3921                              | <0.0001*** |
| <b>Past comorbidities</b> |                                                   |                                                            |               |                                                   |                                                             |            |
| Cardiovascular            | 136(25.95%)                                       | 96(18.32%)                                                 | 0.0212*       | 136(25.95%)                                       | 187(4.76%)                                                  | <0.0001*** |
| Respiratory               | 516(98.47%)                                       | 516(98.47%)                                                | 1.0000        | 516(98.47%)                                       | 3803(96.99%)                                                | 0.8441     |
| Renal                     | 102(19.46%)                                       | 80(15.26%)                                                 | 0.1541        | 102(19.46%)                                       | 137(3.49%)                                                  | <0.0001*** |
| Endocrine                 | 10(1.90%)                                         | 10(1.90%)                                                  | 1.0000        | 10(1.90%)                                         | 29(0.73%)                                                   | 0.0159*    |
| Diabetes mellitus         | 136(25.95%)                                       | 124(23.66%)                                                | 0.5506        | 136(25.95%)                                       | 371(9.46%)                                                  | <0.0001*** |
| Hypertension              | 209(39.88%)                                       | 212(40.45%)                                                | 0.9475        | 209(39.88%)                                       | 495(12.62%)                                                 | <0.0001*** |
| Gastrointestinal          | 510(97.32%)                                       | 510(97.32%)                                                | 1.0000        | 510(97.32%)                                       | 3781(96.42%)                                                | 0.9149     |
| Stroke                    | 90(17.17%)                                        | 69(13.16%)                                                 | 0.1424        | 90(17.17%)                                        | 101(2.57%)                                                  | <0.0001*** |
| <b>Hospitalization</b>    |                                                   |                                                            |               |                                                   |                                                             |            |
| Episodes number           | 1(1-2);98; n=524                                  | 1(1-2);6; n=506                                            | <0.0001***    | 1(1-2);98; n=524                                  | 1(1-2);17; n=3760                                           | <0.0001*** |

|                               |                             |                              |            |                             |                             |            |
|-------------------------------|-----------------------------|------------------------------|------------|-----------------------------|-----------------------------|------------|
| Length of hospital stay, days | 19(13-29.5);326;<br>n=524   | 13(10-19);76; n=506          | <0.0001*** | 19(13-29.5);326;<br>n=524   | 12(8-17);351; n=3760        | <0.0001*** |
| Emergency readmission times   | 2(1-3);32; n=88             | 1(1-2);3; n=38               | 0.1583     | 2(1-3);32; n=88             | 1(1-2);13; n=101            | 0.0005***  |
| <b>Medications</b>            |                             |                              |            |                             |                             |            |
| PPIs dosage, mg               | 2000(720-3960);20880; n=524 | -                            | -          | 1080(600-2430);20880; n=524 | -                           | -          |
| Famotidine                    | 135(25.76%)                 | 122(23.28%)                  | 0.5111     | 135(25.76%)                 | 384(9.79%)                  | <0.0001*** |
| Famotidine dosage, mg         | 2000(480-3580);43520; n=135 | 2120(1200-3680);17200; n=122 | 0.0942     | 680(280-1810);43520; n=135  | 1200(600-2520);24320; n=384 | 0.0006***  |
| ACEI                          | 91(17.36%)                  | 85(16.22%)                   | 0.7361     | 91(17.36%)                  | 160(4.08%)                  | <0.0001*** |
| ARB                           | 75(14.31%)                  | 75(14.31%)                   | 1.0000     | 75(14.31%)                  | 167(4.25%)                  | <0.0001*** |
| Steroid                       | 115(21.94%)                 | 90(17.17%)                   | 0.1283     | 115(21.94%)                 | 517(13.18%)                 | <0.0001*** |
| Kaletra                       | 71(13.54%)                  | 30(5.72%)                    | 0.0001***  | 71(13.54%)                  | 31(0.79%)                   | <0.0001*** |
| Ribavirin                     | 204(38.93%)                 | 179(34.16%)                  | 0.3013     | 204(38.93%)                 | 923(23.53%)                 | <0.0001*** |
| Interferon beta-1B            | 401(76.52%)                 | 394(75.19%)                  | 0.8885     | 401(76.52%)                 | 1464(37.33%)                | <0.0001*** |
| hydroxychloroquine            | 21(4.00%)                   | 20(3.81%)                    | 0.9952     | 21(4.00%)                   | 71(1.81%)                   | 0.0022**   |
| Calcium channel blockers      | 217(41.41%)                 | 212(40.45%)                  | 0.8839     | 217(41.41%)                 | 538(13.72%)                 | <0.0001*** |
| Beta blockers                 | 119(22.70%)                 | 98(18.70%)                   | 0.2213     | 119(22.70%)                 | 209(5.33%)                  | <0.0001*** |
| Diuretics for heart failure   | 115(21.94%)                 | 64(12.21%)                   | 0.0006***  | 115(21.94%)                 | 78(1.98%)                   | <0.0001*** |

|                                   |                                |                              |            |                                 |                                 |            |
|-----------------------------------|--------------------------------|------------------------------|------------|---------------------------------|---------------------------------|------------|
| Diuretics for hypertension        | 7(1.33%)                       | 7(1.33%)                     | 1.0000     | 7(1.33%)                        | 8(0.20%)                        | 0.0002***  |
| Nitrates                          | 19(3.62%)                      | 19(3.62%)                    | 1.0000     | 19(3.62%)                       | 18(0.45%)                       | <0.0001*** |
| Other antihypertensives           | 70(13.35%)                     | 54(10.30%)                   | 0.2063     | 70(13.35%)                      | 80(2.04%)                       | <0.0001*** |
| <b>Complete blood count tests</b> |                                |                              |            |                                 |                                 |            |
| MCV, fL                           | 87.745(84.6-91.2);110.6; n=404 | 87.3(83.7-90.9);102.1; n=422 | 0.1897     | 87.745(84.6-91.2);110.6; n=404  | 86.6(82.7-89.835);104.5; n=2535 | <0.0001*** |
| Basophil, x10 <sup>9</sup> /L     | 0.01(0-0.02);0.13; n=464       | 0.01(0-0.01);0.1; n=479      | 0.0549     | 0.01(0-0.02);0.13; n=464        | 0.01(0-0.02);0.2; n=3220        | 0.0041**   |
| Eosinophil, x10 <sup>9</sup> /L   | 0.001(0-0.05);1.25; n=486      | 0.01(0-0.08);0.8; n=499      | 0.0046**   | 0(0-0.0445);1.25; n=486         | 0.04(0-0.1);2.25; n=3353        | <0.0001*** |
| Lymphocyte, x10 <sup>9</sup> /L   | 1(0.7-1.4);3.2; n=486          | 1.2(0.9-1.6);13.7; n=499     | <0.0001*** | 1(0.7-1.43);3.2; n=486          | 1.42(1.05-1.9);16.99; n=3362    | <0.0001*** |
| Monocyte, x10 <sup>9</sup> /L     | 0.5(0.4-0.7);3.3; n=486        | 0.5(0.4-0.6515);2.1; n=499   | 0.2388     | 0.5(0.3605-0.68);3.26; n=486    | 0.5(0.3795-0.62);2.32; n=3362   | 0.5017     |
| Neutrophil, x10 <sup>9</sup> /L   | 3.8(2.7-5.1);27.2; n=486       | 3.5(2.5-4.5);13.4; n=499     | 0.0015**   | 3.805(2.74-5.0985);27.17; n=486 | 3.2(2.37-4.235);15.82; n=3362   | <0.0001*** |
| WBC, x10 <sup>9</sup> /L          | 5.6(4.4-7.12);29.64; n=493     | 5.4(4.3-7.1);23.9; n=503     | 0.2212     | 5.6(4.4-7.12);29.64; n=493      | 5.4(4.3-6.7);23.9; n=3425       | 0.0149*    |
| MCH, g/dL                         | 30.1(28.7-31.2);36.8; n=493    | 29.9(28.3-31.1);34.7; n=503  | 0.1515     | 30.1(28.7-31.2);36.8; n=493     | 29.65(28.2-30.7);36.1; n=3425   | <0.0001*** |
| Platelet, x10 <sup>9</sup> /L     | 194.5(151.5-240);778; n=492    | 200(159.5-243);593; n=503    | 0.2793     | 194.5(151.5-240);778; n=492     | 220(180-276);773; n=3425        | <0.0001*** |

|                                |                                     |                                |            |                                       |                                       |            |
|--------------------------------|-------------------------------------|--------------------------------|------------|---------------------------------------|---------------------------------------|------------|
| RBC, x10 <sup>12</sup> /L      | 4.49(4.05-4.83);6.08;<br>n=493      | 4.59(4.23-5.03);6.79;<br>n=503 | <0.0001*** | 4.49(4.05-4.83);6.08;<br>n=493        | 4.7195(4.37-5.1);7.45;<br>n=3426      | <0.0001*** |
| HCT, L/L                       | 0.39(0.35-0.42);0.516;<br>n=441     | 0.4(0.372-0.423);0.5;<br>n=419 | 0.0007***  | 0.391(0.353-<br>0.42);0.516; n=441    | 0.404(0.376-<br>0.433);0.5287; n=2944 | <0.0001*** |
| <b>Biochemical tests</b>       |                                     |                                |            |                                       |                                       |            |
| Potassium, mmol/L              | 3.8(3.5-4.1);5.9;<br>n=426          | 3.9(3.5-4.18);5.1;<br>n=438    | 0.0641     | 3.8(3.5-4.1);5.9; n=426               | 3.8(3.6-4.1);5.74;<br>n=2569          | 0.1035     |
| Urate, mmol/L                  | 0.32(0.25-0.47);0.62;<br>n=38       | 0.37(0.24-0.41);0.62;<br>n=23  | 0.6180     | 0.32(0.25-0.47);0.62;<br>n=38         | 0.3(0.24-0.38);0.64;<br>n=89          | 0.2521     |
| Albumin, g/L                   | 36.1(31-40.73);144.5;<br>n=426      | 39(35-43.15);146;<br>n=436     | <0.0001*** | 36.1(31-40.725);144.5;<br>n=426       | 41(37.7-44.1);146;<br>n=2575          | <0.0001*** |
| Sodium, mmol/L                 | 137.7(134.5-<br>140.6);147.5; n=427 | 138.13(136-141);146;<br>n=438  | 0.0012**   | 137.7(134.53-<br>140.6);147.49; n=427 | 139(137-140.7);149.42;<br>n=2575      | <0.0001*** |
| Urea, mmol/L                   | 5(3.8-7.01);39.6;<br>n=427          | 4.7(3.6-5.8);25.53;<br>n=438   | 0.0003***  | 5(3.8-7.01);39.6;<br>n=427            | 3.8(3.04-4.75);41.95;<br>n=2573       | <0.0001*** |
| Protein, g/L                   | 71.7(67-76);93.2;<br>n=354          | 72.8(68.9-76.5);90.1;<br>n=390 | 0.0074**   | 71.7(67-76);93.2;<br>n=354            | 74(70.7-77.9);92.7;<br>n=2329         | <0.0001*** |
| Creatinine, umol/L             | 79(63-99.8);1280;<br>n=427          | 75.1(62-91);361;<br>n=438      | 0.0228*    | 79(63-99.75);1280;<br>n=427           | 69(58-82);461; n=2575                 | <0.0001*** |
| Alkaline phosphatase,<br>U/L   | 67(56-85);872; n=423                | 68.4(57.1-80);932;<br>n=429    | 0.7464     | 67(56-85);872; n=423                  | 64.4(53-80);932;<br>n=2565            | 0.0122*    |
| Aspartate transaminase,<br>U/L | 32.8(24-53.8);1713;<br>n=195        | 30(22-45);1807.4;<br>n=142     | 0.1366     | 32.8(24-53.8);1713;<br>n=195          | 26(21-38);1807.4;<br>n=797            | <0.0001*** |



|                                 |                               |                                |            |                                 |                                  |            |
|---------------------------------|-------------------------------|--------------------------------|------------|---------------------------------|----------------------------------|------------|
| Alanine aminotransferase, U/L   | 29(18-42);380; n=361          | 25(17.1-37.5);130; n=350       | 0.0381*    | 29(18-42);380; n=361            | 22(16-33.5);583; n=2065          | <0.0001*** |
| Bilirubin, umol/L               | 8.7(6-12);235; n=423          | 8(6.4-11.1);36.8; n=429        | 0.3679     | 8.7(6-12);235; n=423            | 7.6(5.4-10.7);104.2; n=2564      | <0.0001*** |
| Glucose, mmol/L                 | 6.4(5.5-8);29.29; n=445       | 5.9(5.3-7.4);19.28; n=424      | 0.0013**   | 6.4(5.5-8);29.3; n=445          | 5.5(5-6.6);26.8; n=2500          | <0.0001*** |
| <b>Diabetes mellitus tests</b>  |                               |                                |            |                                 |                                  |            |
| HbA1c, g/dL                     | 13.1(11.5-14.3);17.5; n=493   | 13.3(11.2-14.4);17.2; n=503    | 0.8845     | 13.1(11.5-14.3);17.5; n=493     | 13.5(12.2-14.6);18.1; n=3426     | <0.0001*** |
| Cholesterol, mmol/L             | 3.7(2.3-4.7);7.436; n=199     | 3.8(2-4.4);7.6; n=177          | 0.5051     | 3.671(2.31-4.7);7.436; n=199    | 3.94(2.885-4.9);9.718; n=464     | 0.009**    |
| D-dimer, ng/mL                  | 455.8(190-878.5);11200; n=138 | 472.3(230.5-794.6);4340; n=122 | 0.8792     | 455.765(190-878.5);11200; n=138 | 280(163.5-494.01);6579.87; n=667 | <0.0001*** |
| High sensitive troponin-I, ng/L | 6.6(2.4-17.8);3876.3; n=226   | 5.4(2.3-8.7);93.6; n=164       | 0.0068**   | 6.56(2.4-17.75);3876.3; n=226   | 3(0.95-5.73);115.3; n=1005       | <0.0001*** |
| Lactate dehydrogenase, U/L      | 247(198-341);1096; n=428      | 215(186-268);1116; n=421       | <0.0001*** | 247(198-341);1096; n=428        | 191(162.9-231);1374; n=2728      | <0.0001*** |
| APTT, second                    | 31.4(27.7-34.9);120; n=375    | 31.5(28.4-34.6);55.2; n=314    | 0.8648     | 31.4(27.7-34.9);120; n=375      | 30.9(27.6-34.4);55.2; n=1678     | 0.2798     |
| Prothrombin Time/INR, second    | 12.1(11.5-12.9);28.5; n=278   | 12(11.5-12.5);26.8; n=206      | 0.0858     | 12.1(11.5-12.9);28.5; n=278     | 12(11.4-12.6);43.4; n=1177       | 0.0172     |
| C-reactive protein, mg/dL       | 1.8(0.5-6.0);34; n=491        | 0.9(0.3-3.2);28.1; n=500       | <0.0001*** | 1.77(0.479-5.975);34; n=491     | 0.311(0.1-0.972);33.99; n=3363   | <0.0001*** |
| <b>Blood gas tests</b>          |                               |                                |            |                                 |                                  |            |

|                                       |                                |                                |         |                               |                               |          |
|---------------------------------------|--------------------------------|--------------------------------|---------|-------------------------------|-------------------------------|----------|
| HCO <sub>3</sub> /Bicarbonate, mmol/L | 23(20.7-24.9);32.8;<br>n=98    | 23.6(18.45-25.3);29.5;<br>n=26 | 0.5172  | 23(20.7-24.9);32.8;<br>n=98   | 23.6(19.8-25.3);29.5;<br>n=69 | 0.9948   |
| Base excess, mmol/L                   | -0.9(-3-1.2);9.5; n=253        | 0(-2.35-2.2);6.1; n=87         | 0.0273* | -0.9(-3-1.2);9.5; n=253       | -0.1(-2.1-1.9);7.2;<br>n=259  | 0.0021** |
| Blood pCO <sub>2</sub> , kPa          | 4.8(4.03-5.62);10.94;<br>n=253 | 4.77(4.24-5.76);7.72;<br>n=87  | 0.6467  | 4.8(4.03-5.6);10.9;<br>n=253  | 4.9(4.3-5.8);8.3; n=260       | 0.1698   |
| Blood pH                              | 7.42(7.37-7.47);7.61;<br>n=253 | 7.433(7.38-7.46);7.54;<br>n=88 | 0.4239  | 7.42(7.4-7.5);7.6;<br>n=253   | 7.43(7.4-7.5);7.6; n=260      | 0.5672   |
| Calcium, mmol/L                       | 1.13(1.06-1.17);1.33;<br>n=28  | -                              | -       | 1.14(1.06-1.18);1.33;<br>n=28 | 1.13(1.12-1.19);1.31;<br>n=8  | 0.4235   |

**Supplementary Table 9. Baseline clinical characteristics of patients with or without famotidine use before and after propensity score matching (1:1)**\* for  $p \leq 0.05$ , \*\* for  $p \leq 0.01$ , \*\*\* for  $p \leq 0.001$ 

| Characteristics           | After 1:1 matching                                      |                                                                  |          | Before matching                                         |                                                                   |            |
|---------------------------|---------------------------------------------------------|------------------------------------------------------------------|----------|---------------------------------------------------------|-------------------------------------------------------------------|------------|
|                           | Famotidine (N=519)<br>Median<br>(IQR);Max;N<br>Count(%) | No<br>famotidine<br>(N=519)<br>Median (IQR);Max;N<br>or Count(%) | P value  | Famotidine (N=519)<br>Median (IQR);Max;N<br>or Count(%) | No<br>famotidine<br>(N=3926)<br>Median (IQR);Max;N<br>or Count(%) | P value    |
| <b>Demographics</b>       |                                                         |                                                                  |          |                                                         |                                                                   |            |
| Male gender               | 242(46.62%)                                             | 250(48.16%)                                                      | 0.8085   | 242(46.62%)                                             | 1987(50.61%)                                                      | 0.3410     |
| Age, years                | 60.4(47.7-70.1);97.6;<br>n=519                          | 58.0 (46.8-68.1);96.6;<br>n=519                                  | 0.0501   | 60.4(47.7-<br>70.0472);97.6; n=519                      | 42.3(27.5-58.9);100.6;<br>n=3926                                  | <0.0001*** |
| <b>Past comorbidities</b> |                                                         |                                                                  |          |                                                         |                                                                   |            |
| Cardiovascular            | 98(18.88%)                                              | 78(15.02%)                                                       | 0.1893   | 98(18.88%)                                              | 225(5.73%)                                                        | <0.0001*** |
| Respiratory               | 512(98.65%)                                             | 512(98.65%)                                                      | 1.0000   | 512(98.65%)                                             | 3807(96.96%)                                                      | 0.8210     |
| Renal                     | 57(10.98%)                                              | 53(10.21%)                                                       | 0.7930   | 57(10.98%)                                              | 182(4.63%)                                                        | <0.0001*** |
| Endocrine                 | 7(1.34%)                                                | 7(1.34%)                                                         | 1.0000   | 7(1.34%)                                                | 32(0.81%)                                                         | 0.3360     |
| Diabetes mellitus         | 121(23.31%)                                             | 107(20.61%)                                                      | 0.4434   | 121(23.31%)                                             | 386(9.83%)                                                        | <0.0001*** |
| Hypertension              | 171(32.94%)                                             | 166(31.98%)                                                      | 0.8619   | 171(32.94%)                                             | 533(13.57%)                                                       | <0.0001*** |
| Gastrointestinal          | 508(97.88%)                                             | 508(97.88%)                                                      | 1.0000   | 508(97.88%)                                             | 3783(96.35%)                                                      | 0.8393     |
| Stroke                    | 83(15.99%)                                              | 55(10.59%)                                                       | 0.0316*  | 83(15.99%)                                              | 108(2.75%)                                                        | <0.0001*** |
| <b>Hospitalization</b>    |                                                         |                                                                  |          |                                                         |                                                                   |            |
| Episodes number           | 1(1-2);17; n=519                                        | 1(1-2);25; n=505                                                 | 0.0026** | 1(1-2);17; n=519                                        | 1(1-2);98; n=3765                                                 | <0.0001*** |

|                               |                             |                              |            |                             |                             |            |
|-------------------------------|-----------------------------|------------------------------|------------|-----------------------------|-----------------------------|------------|
| Length of hospital stay, days | 17(11.5-25);178; n=519      | 13(9-20);120; n=505          | <0.0001*** | 17(11.5-25);178; n=519      | 12(8-18);351; n=3765        | <0.0001*** |
| Emergency readmission times   | 2(1-3);10; n=45             | 1(1-1);13; n=34              | 0.01318    | 2(1-3);10; n=45             | 1(1-2);32; n=144            | 0.0639     |
| <b>Medications</b>            |                             |                              |            |                             |                             |            |
| PPIs                          | 135(26.01%)                 | 124(23.89%)                  | 0.5878     | 135(26.01%)                 | 389(9.90%)                  | <0.0001*** |
| PPIs dosage, mg               | 2440(800-4120);20880; n=135 | 2960(1100-4040);10000; n=124 | 0.6272     | 1040(540-2040);20880; n=135 | 1120(640-2600);19320; n=389 | 0.2851     |
| Famotidine dosage, mg         | 1280(520-3320);43520; n=519 | -                            | -          | 1040(480-2440);43520; n=519 | -                           | -          |
| ACEI                          | 72(13.87%)                  | 62(11.94%)                   | 0.4708     | 72(13.87%)                  | 179(4.55%)                  | <0.0001*** |
| ARB                           | 60(11.56%)                  | 57(10.98%)                   | 0.8686     | 60(11.56%)                  | 182(4.63%)                  | <0.0001*** |
| Steroid                       | 110(21.19%)                 | 100(19.26%)                  | 0.5798     | 110(21.19%)                 | 522(13.29%)                 | <0.0001*** |
| Kaletra                       | 28(5.39%)                   | 22(4.23%)                    | 0.4940     | 28(5.39%)                   | 74(1.88%)                   | <0.0001*** |
| Ribavirin                     | 185(35.64%)                 | 178(34.29%)                  | 0.7985     | 185(35.64%)                 | 942(23.99%)                 | <0.0001*** |
| Interferon beta-1B            | 366(70.52%)                 | 357(68.78%)                  | 0.8348     | 366(70.52%)                 | 1499(38.18%)                | <0.0001*** |
| hydroxychloroquine            | 13(2.50%)                   | 13(2.50%)                    | 1.0000     | 13(2.50%)                   | 79(2.01%)                   | 0.5751     |
| Calcium channel blockers      | 172(33.14%)                 | 178(34.29%)                  | 0.8293     | 172(33.14%)                 | 583(14.84%)                 | <0.0001*** |
| Beta blockers                 | 98(18.88%)                  | 83(15.99%)                   | 0.3429     | 98(18.88%)                  | 230(5.85%)                  | <0.0001*** |
| Diuretics for heart failure   | 51(9.82%)                   | 46(8.86%)                    | 0.7044     | 51(9.82%)                   | 142(3.61%)                  | <0.0001*** |

|                                   |                              |                               |          |                              |                               |            |
|-----------------------------------|------------------------------|-------------------------------|----------|------------------------------|-------------------------------|------------|
| Diuretics for hypertension        | 3(0.57%)                     | 3(0.57%)                      | 1.0000   | 3(0.57%)                     | 12(0.30%)                     | 0.5492     |
| Nitrates                          | 12(2.31%)                    | 12(2.31%)                     | 1.0000   | 12(2.31%)                    | 25(0.63%)                     | 0.0003***  |
| Other antihypertensives           | 33(6.35%)                    | 32(6.16%)                     | 0.9940   | 33(6.35%)                    | 117(2.98%)                    | 0.0002***  |
| <b>Complete blood count tests</b> |                              |                               |          |                              |                               |            |
| MCV, fL                           | 87.4(83.5-91.3);105.4; n=360 | 87.6(84.1-90.55);102.1; n=383 | 0.6515   | 87.4(83.5-91.3);105.4; n=360 | 86.7(83-89.9);110.6; n=2579   | 0.0216*    |
| Basophil, x10 <sup>9</sup> /L     | 0.009(0-0.02);0.2; n=469     | 0.01(0-0.02);0.1; n=461       | 0.0299*  | 0.009(0-0.02);0.19; n=469    | 0.01(0-0.02);0.2; n=3215      | <0.0001*** |
| Eosinophil, x10 <sup>9</sup> /L   | 0.01(0-0.07);0.8; n=482      | 0.01(0-0.1);0.67; n=485       | 0.0059** | 0.01(0-0.0655);0.8; n=482    | 0.04(0-0.1);2.25; n=3357      | <0.0001*** |
| Lymphocyte, x10 <sup>9</sup> /L   | 1.13(0.8-1.55);4.66; n=483   | 1.21(0.9-1.63);3.24; n=485    | 0.0032** | 1.13(0.8-1.55);4.66; n=483   | 1.41(1.016-1.9);16.99; n=3365 | <0.0001*** |
| Monocyte, x10 <sup>9</sup> /L     | 0.48(0.33-0.64);1.45; n=483  | 0.5(0.39-0.67);1.39; n=485    | 0.0532   | 0.48(0.33-0.64);1.45; n=483  | 0.5(0.38-0.63);3.26; n=3365   | 0.1153     |
| Neutrophil, x10 <sup>9</sup> /L   | 3.4(2.4-4.32);15.9; n=483    | 3.32(2.4-4.45);17.97; n=485   | 0.7966   | 3.4(2.4-4.32);15.9; n=483    | 3.27(2.4-4.38);27.17; n=3365  | 0.7461     |
| WBC, x10 <sup>9</sup> /L          | 5.16(4.03-6.26);17.9; n=489  | 5.34(4.3-6.8);19.95; n=489    | 0.0702   | 5.16(4.029-6.26);17.9; n=489 | 5.47(4.38-6.8);29.64; n=3429  | 0.0002***  |
| MCH, g/dL                         | 29.8(28.1-31);36.8; n=489    | 29.8(28.7-31);34.6; n=489     | 0.3479   | 29.8(28.1-31);36.8; n=489    | 29.7(28.3-30.7);35.9; n=3429  | 0.2134     |
| Platelet, x10 <sup>9</sup> /L     | 199(160-241.75);773; n=488   | 203(164-253);597.2; n=489     | 0.1917   | 199(160-241.75);773; n=488   | 220(179-276);778; n=3429      | <0.0001*** |

|                                |                                   |                                  |          |                                     |                                        |            |
|--------------------------------|-----------------------------------|----------------------------------|----------|-------------------------------------|----------------------------------------|------------|
| RBC, x10 <sup>12</sup> /L      | 4.51(4.17-4.89);6.97;<br>n=489    | 4.6(4.28-4.93);7.24;<br>n=489    | 0.0303*  | 4.51(4.17-4.89);6.97;<br>n=489      | 4.7(4.4-5.1);7.45;<br>n=3430           | <0.0001*** |
| HCT, L/L                       | 0.39(0.36-0.42);0.49;<br>n=420    | 0.40(0.37-0.42);0.51;<br>n=416   | 0.0021** | 0.39(0.36-0.42);0.49;<br>n=420      | 0.40(0.38-0.43);0.53;<br>n=2965        | <0.0001*** |
| <b>Biochemical tests</b>       |                                   |                                  |          |                                     |                                        |            |
| Potassium, mmol/L              | 3.8(3.5-4.1);5.67;<br>n=432       | 3.8(3.5-4.11);5.9;<br>n=398      | 0.8513   | 3.8(3.5-4.1);5.67;<br>n=432         | 3.8(3.59-4.1);5.9;<br>n=2563           | 0.4478     |
| Urate, mmol/L                  | 0.37(0.31-0.45);0.62;<br>n=25     | 0.32(0.24-0.39);0.54;<br>n=27    | 0.0973   | 0.37(0.3056-<br>0.45);0.621; n=25   | 0.2875(0.2375-<br>0.3685);0.635; n=102 | 0.0038**   |
| Albumin, g/L                   | 39(35-42.25);141.36;<br>n=434     | 38.9(34.6-43);146;<br>n=399      | 0.4241   | 39(35-42.25);141.36;<br>n=434       | 41(37-44.1);146;<br>n=2567             | <0.0001*** |
| Sodium, mmol/L                 | 138(135.1-<br>140.4);147.5; n=432 | 138.91(136.4-<br>141);146; n=398 | 0.0352*  | 138(135.1-<br>140.35);147.49; n=432 | 139(137-<br>140.7);149.42; n=2570      | <0.0001*** |
| Urea, mmol/L                   | 4.3(3.22-5.6);36.2;<br>n=432      | 4.4(3.3-5.5);15.19;<br>n=397     | 0.9255   | 4.3(3.22-5.6);36.2;<br>n=432        | 3.9(3.1-4.845);41.95;<br>n=2568        | <0.0001*** |
| Protein, g/L                   | 72.9(68.8-77.3);93.2;<br>n=373    | 73(69.95-77.2);88.9;<br>n=343    | 0.5548   | 72.9(68.8-77.3);93.2;<br>n=373      | 74(70.4-77.5);92.7;<br>n=2310          | 0.0007***  |
| Creatinine, umol/L             | 71.05(61-86.5);1280;<br>n=432     | 72(59-85.5);250;<br>n=398        | 0.8335   | 71.05(61-86.5);1280;<br>n=432       | 69.75(58-84);1216.2;<br>n=2570         | 0.0058**   |
| Alkaline phosphatase,<br>U/L   | 65(54-80);932; n=430              | 62(53-79);275.9;<br>n=395        | 0.2198   | 65(54-80);932; n=430                | 65(53.95-80);550;<br>n=2558            | 0.9157     |
| Aspartate transaminase,<br>U/L | 29(22-49);1807.4;<br>n=173        | 28(22.85-40.5);139;<br>n=156     | 0.2748   | 29(22-49);1807.4;<br>n=173          | 26.1(21-39);863;<br>n=819              | 0.0056**   |

|                                 |                                |                              |          |                                |                                |            |
|---------------------------------|--------------------------------|------------------------------|----------|--------------------------------|--------------------------------|------------|
| Alanine aminotransferase, U/L   | 23(16-36.3);380; n=348         | 26(18.15-41.25);201; n=327   | 0.0031** | 23(16-36.3);380; n=348         | 23(16-35);583; n=2078          | 0.8508     |
| Bilirubin, umol/L               | 7.8(5.8-11.8);56.5; n=429      | 8(5.8-11);59.7; n=395        | 0.8474   | 7.8(5.8-11.8);56.5; n=429      | 7.8(5.5-10.8);235; n=2558      | 0.1297     |
| Glucose, mmol/L                 | 5.9(5.26-7.4);26.5; n=425      | 5.9(5.2-7.5);29.3; n=407     | 0.8077   | 5.86(5.26-7.4);26.5; n=425     | 5.58(5-6.7);29.29; n=2520      | <0.0001*** |
| <b>Diabetes mellitus tests</b>  |                                |                              |          |                                |                                |            |
| HbA1c, g/dL                     | 13(11.4-14.1);17.1; n=489      | 13.5(11.8-14.3);17.4; n=489  | 0.0365*  | 13(11.4-14.1);17.1; n=489      | 13.5(12.2-14.7);18.1; n=3430   | <0.0001*** |
| Cholesterol, mmol/L             | 3.8(2.8-4.6);7.559; n=159      | 3.71(2-4.6);7.0; n=136       | 0.4988   | 3.8(2.8-4.6);7.559; n=159      | 3.9(2.6-4.9);9.718; n=504      | 0.4820     |
| D-dimer, ng/mL                  | 369(220.5-743.6);6544.8; n=124 | 416(241-810.51);11200; n=125 | 0.6954   | 369(220.5-743.6);6544.8; n=124 | 280(152.7-540.01);11200; n=681 | 0.0006***  |
| High sensitive troponin-I, ng/L | 4.8(2-10);400.2; n=200         | 4.5(2.2-10);3876.3; n=181    | 0.7649   | 4.772(2-10);400.2; n=200       | 3(1-6.29);3876.3; n=1031       | <0.0001*** |
| Lactate dehydrogenase, U/L      | 219(180.5-281.5);1116; n=411   | 210(171-260);779; n=399      | 0.0105*  | 219(180.5-281.5);1116; n=411   | 194(164-236);1374; n=2745      | <0.0001*** |
| APTT, second                    | 31.6(27.9-34.8);66.4; n=319    | 30.3(27.5-33.9);120; n=311   | 0.0511   | 31.6(27.9-34.8);66.4; n=319    | 30.8(27.6-34.4);120; n=1734    | 0.1432     |
| Prothrombin Time/INR, second    | 12(11.4-12.6);43.4; n=220      | 11.9(11.5-12.6);28.5; n=219  | 0.8448   | 12(11.35-12.55);43.4; n=220    | 12(11.5-12.6);31.7; n=1235     | 0.2356     |
| C-reactive protein, mg/dL       | 0.8(0.3-2.9);34; n=492         | 0.6(0.25-2.4);23.4; n=482    | 0.1259   | 0.81(0.26-2.9);34; n=492       | 0.31(0.11-1.2);29.8; n=3362    | <0.0001*** |
| <b>Blood gas tests</b>          |                                |                              |          |                                |                                |            |

|                                       |                                 |                                |        |                               |                                |        |
|---------------------------------------|---------------------------------|--------------------------------|--------|-------------------------------|--------------------------------|--------|
| HCO <sub>3</sub> /Bicarbonate, mmol/L | 23.8(19.9-26);30.7;<br>n=45     | 23.5(21-25.15);27.7;<br>n=32   | 0.5350 | 23.8(19.9-26);30.7;<br>n=45   | 22.7(20.3-24.7);32.8;<br>n=122 | 0.2187 |
| Base excess, mmol/L                   | -0.4(-2.7-1.65);6.1;<br>n=135   | -0.4(-1.9-2.1);6.4;<br>n=89    | 0.3969 | -0.4(-2.7-1.65);6.1;<br>n=135 | -0.5(-2.5-1.5);9.5;<br>n=377   | 0.6725 |
| Blood pCO <sub>2</sub> , kPa          | 4.78(4.07-5.68);10.94;<br>n=135 | 5.18(4.32-5.51);10.65;<br>n=89 | 0.5976 | 4.8(4.1-5.7);10.9;<br>n=135   | 4.9(4.2-5.73);10.65;<br>n=378  | 0.6196 |
| Blood pH                              | 7.42(7.38-7.48);7.61;<br>n=135  | 7.42(7.39-7.47);7.61;<br>n=89  | 0.5616 | 7.4(7.4-7.5);7.6; n=135       | 7.42(7.4-7.47);7.6;<br>n=378   | 0.8737 |
| Calcium, mmol/L                       | 1.095(0.99-1.15);1.19;<br>n=8   | 1.17(1.02-1.18);1.33;<br>n=9   | 0.2270 | 1.095(0.99-1.15);1.19;<br>n=8 | 1.135(1.1-1.185);1.33;<br>n=28 | 0.1227 |



**Supplementary Table 10. Composite risk of meeting the primary outcome among hospitalized Covid-19 patients after propensity score matching (1:1).**\* for  $p \leq 0.05$ , \*\* for  $p \leq 0.01$ , \*\*\* for  $p \leq 0.001$ 

| <b>Characteristics</b>    | <b>Famotidine vs Control<br/>HR [95% CI]</b> | <b>P value</b> | <b>PPIs vs Control<br/>HR [95% CI]</b> | <b>P value</b> |
|---------------------------|----------------------------------------------|----------------|----------------------------------------|----------------|
| PPIs/Control              | -                                            | -              | 11.76[7.77, 17.79]                     | <0.0001***     |
| PPIs dosage, mg           | -                                            | -              | 1.00[1.00, 1.00]                       | <0.0001***     |
| Famotidine/Control        | 1.81[1.35, 2.43]                             | <0.0001***     | -                                      | -              |
| Famotidine dosage, mg     | 1.00[1.00, 1.00]                             | 0.155          | -                                      | -              |
| <b>Demographics</b>       |                                              |                |                                        |                |
| Male gender               | 1.79[1.33, 2.42]                             | 0.0001***      | 2.09[1.44, 3.04]                       | 0.0001***      |
| Age, years                | 1.04[1.03, 1.05]                             | <0.0001***     | 1.07[1.05, 1.08]                       | <0.0001***     |
| <b>Past comorbidities</b> |                                              |                |                                        |                |
| Cardiovascular            | 1.60[1.18, 2.16]                             | 0.0023**       | 2.32[1.57, 3.43]                       | <0.0001***     |
| Respiratory               | 2.63[0.64, 10.79]                            | 0.179          | 2.12[0.29, 15.42]                      | 0.459          |
| Renal                     | 2.85[2.13, 3.82]                             | <0.0001***     | 3.52[2.36, 5.26]                       | <0.0001***     |
| Endocrine                 | 2.00[0.89, 4.52]                             | 0.0945.        | 2.10[0.67, 6.64]                       | 0.205          |
| Diabetes mellitus         | 1.79[1.34, 2.40]                             | <0.0001***     | 2.33[1.60, 3.38]                       | <0.0001***     |
| Hypertension              | 2.03[1.54, 2.69]                             | <0.0001***     | 2.78[1.94, 3.98]                       | <0.0001***     |
| Gastrointestinal          | 0.87[0.42, 1.80]                             | 0.714          | 0.74[0.27, 2.02]                       | 0.551          |
| Stroke                    | 1.71[1.23, 2.38]                             | 0.0014**       | 2.78[1.85, 4.17]                       | <0.0001***     |
| <b>Hospitalizations</b>   |                                              |                |                                        |                |
| Episodes number           | 1.02[1.00, 1.04]                             | 0.0233*        | 1.15[1.10, 1.21]                       | <0.0001***     |

|                                   |                      |            |                         |            |
|-----------------------------------|----------------------|------------|-------------------------|------------|
| Length of hospital stay, days     | 1.01[1.01, 1.01]     | <0.0001*** | 1.02[1.02, 1.03]        | <0.0001*** |
| Emergency readmission times       | 1.03[0.96, 1.11]     | 0.418      | 1.02[0.84, 1.23]        | 0.876      |
| <b>Medications</b>                |                      |            |                         |            |
| ACEI                              | 2.20[1.61, 2.99]     | <0.0001*** | 2.96[1.99, 4.42]        | <0.0001*** |
| ARB                               | 0.99[0.67, 1.47]     | 0.959      | 1.19[0.70, 2.02]        | 0.519      |
| Steroid                           | 0.85[0.59, 1.23]     | 0.396      | 0.45[0.26, 0.81]        | 0.0072**   |
| Kaletra                           | 8.74[6.53, 11.69]    | <0.0001*** | 18.19[12.42, 26.64]     | <0.0001*** |
| Ribavirin                         | 0.94[0.71, 1.26]     | 0.699      | 0.79[0.54, 1.16]        | 0.227      |
| Interferon beta-1B                | 2.81[1.81, 4.36]     | <0.0001*** | 2.88[1.73, 4.78]        | <0.0001*** |
| Hydroxychloroquine                | 1.29[0.70, 2.37]     | 0.417      | 4.04[2.17, 7.54]        | <0.0001*** |
| Calcium channel blockers          | 1.90[1.43, 2.51]     | <0.0001*** | 2.78[1.93, 3.99]        | <0.0001*** |
| Beta blockers                     | 1.45[1.06, 1.99]     | 0.021*     | 1.97[1.32, 2.93]        | 0.0009***  |
| Diuretics for heart failure       | 6.08[4.60, 8.04]     | <0.0001*** | 9.59[6.68, 13.75]       | <0.0001*** |
| Diuretics for hypertension        | 2.70[1.20, 6.08]     | 0.0169*    | 5.46[1.73, 17.19]       | 0.0038**   |
| Nitrates                          | 0.24[0.06, 0.96]     | 0.0434*    | 0.70[0.17, 2.82]        | 0.612      |
| Other antihypertensives           | 1.37[0.94, 2.00]     | 0.0977.    | 2.79[1.69, 4.61]        | <0.0001*** |
| <b>Complete blood count tests</b> |                      |            |                         |            |
| MCV, fL                           | 1.01[0.99, 1.03]     | 0.282      | 1.04[1.01, 1.08]        | 0.013*     |
| Basophil, x10 <sup>9</sup> /L     | 957.2[2.3, 394292.0] | 0.0255*    | 5512.0[6.45, 4713864.0] | 0.0124*    |
| Eosinophil, x10 <sup>9</sup> /L   | 0.29[0.05, 1.83]     | 0.188      | 0.03[0.00, 0.47]        | 0.0132*    |
| Lymphocyte, x10 <sup>9</sup> /L   | 0.38[0.28, 0.53]     | <0.0001*** | 0.24[0.16, 0.37]        | <0.0001*** |
| Monocyte, x10 <sup>9</sup> /L     | 1.29[0.78, 2.13]     | 0.319      | 2.88[1.40, 5.90]        | 0.004**    |
| Neutrophil, x10 <sup>9</sup> /L   | 1.19[1.16, 1.23]     | <0.0001*** | 1.29[1.23, 1.35]        | <0.0001*** |

|                                 |                    |            |                     |             |
|---------------------------------|--------------------|------------|---------------------|-------------|
| WBC, x10 <sup>9</sup> /L        | 1.16[1.12, 1.19]   | <0.0001*** | 1.24[1.18, 1.30]    | <0.0001***  |
| MCH, g/dL                       | 1.00[0.95, 1.05]   | 0.888      | 1.05[0.98, 1.13]    | 0.153       |
| Platelet, x10 <sup>9</sup> /L   | 1.00[1.00, 1.00]   | 0.0376*    | 0.998[0.995, 1.000] | 0.0808.     |
| RBC, x10 <sup>12</sup> /L       | 0.68[0.55, 0.85]   | 0.0006***  | 0.45[0.34, 0.59]    | <0.0001***  |
| HCT, L/L                        | 0.01[0.00, 0.21]   | 0.00267**  | 0.00[0.00, 0.017]   | <0.0001***  |
| <b>Biochemical tests</b>        |                    |            |                     |             |
| Potassium, mmol/L               | 1.75[1.29, 2.38]   | 0.0003***  | 1.39[0.93, 2.08]    | 0.11        |
| Urate, mmol/L                   | 3.52[0.13, 95.37]  | 0.455      | 0.90[0.01, 61.40]   | 0.961       |
| Albumin, g/L                    | 1.00[0.99, 1.00]   | 0.231      | 0.99[0.98, 1.00]    | 0.126       |
| Sodium, mmol/L                  | 0.97[0.94, 1.01]   | 0.0958.    | 0.93[0.89, 0.97]    | 0.0012**    |
| Urea, mmol/L                    | 1.09[1.07, 1.11]   | <0.0001*** | 1.13[1.10, 1.16]    | <0.0001***  |
| Protein, g/L                    | 0.93[0.91, 0.95]   | <0.0001*** | 0.93[0.90, 0.97]    | <0.0001***  |
| Creatinine, umol/L              | 1.00[1.00, 1.00]   | <0.0001*** | 1.003[1.002, 1.004] | <0.0001***  |
| Alkaline phosphatase, U/L       | 1.00[1.00, 1.00]   | <0.0001*** | 1.004[1.002, 1.005] | <0.0001***  |
| Aspartate transaminase, U/L     | 1.00[1.00, 1.00]   | <0.0001*** | 1.002[1.001, 1.002] | <0.0001***  |
| Alanine aminotransferase, U/L   | 1.01[1.00, 1.01]   | 0.0016**   | 1.011[1.007, 1.016] | <0.0001***  |
| Bilirubin, umol/L               | 1.02[1.01, 1.03]   | <0.0001*** | 1.02[1.00, 1.05]    | 0.0361*     |
| Glucose, mmol/L                 | 1.12[1.08, 1.17]   | <0.0001*** | 1.14[1.09, 1.19]    | <0.0001***  |
| <b>Diabetes mellitus tests</b>  |                    |            |                     |             |
| HbA1C, g/dL                     | 0.94[0.92, 0.97]   | <0.0001*** | 0.94[0.91, 0.97]    | 0.000158*** |
| Cholesterol, mmol/L             | 0.96[0.85, 1.08]   | 0.45       | 0.95[0.81, 1.12]    | 0.531       |
| D-dimer, ng/mL                  | 1.00[1.00, 1.00]   | <0.0001*** | 1.000[1.000, 1.000] | <0.0001***  |
| High sensitive troponin-I, ng/L | 1.0[0.9996, 1.001] | 0.588      | 1.0[0.9995, 1.001]  | 0.912       |

|                                       |                    |            |                       |            |
|---------------------------------------|--------------------|------------|-----------------------|------------|
| Lactate dehydrogenase, U/L            | 1.00[1.00, 1.00]   | <0.0001*** | 1.005[1.004, 1.006]   | <0.0001*** |
| APTT, second                          | 1.03[1.02, 1.05]   | <0.0001*** | 1.04[1.02, 1.05]      | <0.0001*** |
| Prothrombin Time/INR, second          | 1.13[1.07, 1.19]   | <0.0001*** | 1.05[0.99, 1.11]      | 0.119      |
| C-reactive protein, mg/dL             | 1.11[1.09, 1.13]   | <0.0001*** | 1.12[1.10, 1.15]      | <0.0001*** |
| <b>Blood gas tests</b>                |                    |            |                       |            |
| HCO <sub>3</sub> /Bicarbonate, mmol/L | 0.94[0.88, 1.00]   | 0.0642.    | 0.92[0.84, 1.01]      | 0.0752.    |
| Base excess, mmol/L                   | 0.86[0.83, 0.90]   | <0.0001*** | 0.92[0.87, 0.98]      | 0.0062**   |
| Blood pCO <sub>2</sub> , kPa          | 0.91[0.80, 1.03]   | 0.144      | 0.87[0.74, 1.03]      | 0.101      |
| Blood pH                              | 0.04[0.01, 0.27]   | 0.001**    | 1.12[0.08, 16.17]     | 0.935      |
| Calcium, mmol/L                       | 11.2[0.10, 1225.0] | 0.313      | 423.3[0.31, 574342.0] | 0.1        |
